# Supplementary material for: Getting It All Together: the Fragmentation of the Disciplines and the Unity of Knowledge
Source: Royal Society of Chemistry journal article supplement (doi:10.1039/c8cc03520b), 2012-01-01
Supplement: c8cc03520b1.pdf [file c8cc03520b1.pdf]

## Supporting Information

### New Near-infrared Rhodamine Dyes with Large Stokes Shifts for Sensitive Sensing of Cellular pH changes and Fluctuations

Yibin Zhang,<sup>a,b</sup> Shuai Xia,<sup>a</sup> Mingxi Fang,<sup>a</sup> Wafa Mazi,<sup>a</sup> Yanbo Zeng,<sup>a</sup> Taylor Johnston,<sup>a</sup> Adam Pap,<sup>a</sup> Rudy L. Luck<sup>a\*</sup> and Haiying Liu<sup>a\*</sup>

<sup>a</sup>Department of Chemistry, Michigan Technological University, Houghton, MI 49931, E-mail: [hyliu@mtu.edu](mailto:hyliu@mtu.edu); [rluck@mtu.edu](mailto:rluck@mtu.edu)

<sup>b</sup>School of Chemistry and Chemical Engineering, Yangtze Normal University, Chongqing 408100, China

#### CONTENTS

|                                                                                                                             |       |
|-----------------------------------------------------------------------------------------------------------------------------|-------|
| 1. Summary of near-infrared fluorescent probes for detection of pH. ....                                                    | 2-4   |
| 2. Synthetic route to near-infrared rhodamine dyes <b>A</b> , <b>B</b> and <b>C</b> . ....                                  | 5-6   |
| 3. <sup>1</sup> H and <sup>13</sup> C NMR spectra of near-infrared rhodamine dyes <b>A</b> , <b>B</b> , and <b>C</b> . .... | 6-9   |
| 4. A fluorescence standard and calculation of fluorescence quantum yields of the rhodamine dyes .....                       | 9-11  |
| 5. Determination of pK <sub>a</sub> by fluorometric titration.....                                                          | 12    |
| 6. Dye stability and selectivity .....                                                                                      | 12    |
| 7. Computationally derivated structures for rhodamine dyes <b>A-D</b> .....                                                 | 13-30 |
| 8. Cytotoxicity of the rhodamine dyes .....                                                                                 | 31    |
| 9. Cell culture and fluorescent imaging .....                                                                               | 31-34 |
| 10. References .....                                                                                                        | 35-36 |

## 1. Summary of near-infrared fluorescent probes for detection of pH

| Probe structure                                                                     | Molar Absorption Coefficients ( $M^{-1} \text{ cm}^{-1}$ ) | Absorbance Maxima (nm) | Emission Maxima (nm) | fluorescence Quantum Yields | solvent                                   | pK <sub>a</sub> | references |
|-------------------------------------------------------------------------------------|------------------------------------------------------------|------------------------|----------------------|-----------------------------|-------------------------------------------|-----------------|------------|
| 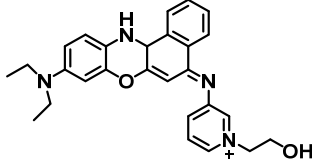   | $3.3 \times 10^4$                                          | 630                    | 723                  | 0.01                        | phosphate buffer containing 0.1% DMSO     | 7.1             | 1          |
|    | $1.3 \times 10^5$                                          | 608                    | 672                  | 0.17 at pH                  | phosphate buffer                          | 7.2             | 2          |
|    | $2.65 \times 10^4$                                         | 554                    | 657                  | 0.12 at pH 1.6              | phosphate buffer                          | 2.4             | 3          |
|    | -                                                          | 580                    | 650                  | 0.24                        | 40 mM BR buffer                           | 5.04            | 4          |
|  | $7.28 \times 10^4$                                         | 546                    | 655                  | 0.22 at pH 2.3              | ethanol/water (2/1, v/v)                  | 4.40            | 5          |
|  | $5.45 \times 10^4$                                         | 572                    | 722                  | 0.026 at pH 2.0             | acetonitrile-buffer (v/v, 3 : 7) solution | 3.93            | 6          |
|  | $3.0 \times 10^4$                                          | 529                    | 680                  | 0.01 at pH 8.0              | phosphate buffer                          | 6.3             | 7          |
|  |                                                            | 681                    | 708                  | 0.16 at pH 5.0              | phosphate buffer                          | 5.0             | 8          |

|                                                                                     |                    |     |     |                 |                                         |      |    |
|-------------------------------------------------------------------------------------|--------------------|-----|-----|-----------------|-----------------------------------------|------|----|
| 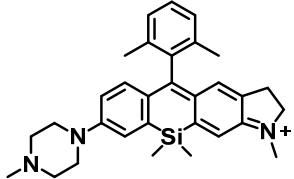   | 25000              | 605 | 683 | 0.18            | phosphate buffer                        | 6.1  | 9  |
|    | 130000             | 759 | 789 | 0.03            | phosphate buffer                        | 5.5  | 10 |
|    |                    | 771 | 691 | 0.05            | DMSO                                    | 4.71 | 11 |
|    |                    | 720 | 739 | 0.08            | B-R buffer                              | 4.98 | 12 |
|   |                    | 775 | 794 | 0.068           | aqueous solution containing 30% ethanol | 7.4  | 13 |
|  | $5.86 \times 10^4$ | 700 | 733 | 0.53            | Ethanol                                 | -    | 14 |
|  | $2.36 \times 10^4$ | 715 | 737 | 0.068 at pH 2.5 | Citrate buffer containing 30% ethanol   | 4.9  | 15 |

|                                                                                     |                               |     |     |                  |                                                |      |           |
|-------------------------------------------------------------------------------------|-------------------------------|-----|-----|------------------|------------------------------------------------|------|-----------|
| 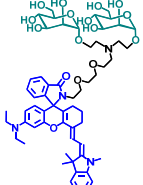   | $3.0 \times 10^4$             | 713 | 740 | 0.081 at pH 4.4  | Citrate phosphate buffer containing 1% ethanol | 6.1  | 16        |
|    | $3.0 \times 10^4$             | 713 | 740 | 0.084 at pH 4.4  | Citrate phosphate buffer containing 1% ethanol | 5.8  | 16        |
|    |                               | 565 | 652 | 0.0032 at pH 7.4 | Buffer with 1% DMSO                            | 6.2  | 17        |
|    | $4.46 \times 10^4$ at pH 4.46 | 671 | 716 | 0.07 at pH 4.5   | Buffer                                         | 3.57 | 18        |
|   | $4.1 \times 10^4$ at pH 2.5   | 745 | 755 | 0.083 at pH 3.0  | buffer containing 40% ethanol                  | 4.2  | 19        |
|  | $3.3 \times 10^4$ at pH 2.5   | 735 | 740 | 0.079 at pH 3.0  | buffer containing 40% ethanol                  | 4.8  | 19        |
|  | $3.8 \times 10^4$ at pH 3.2   | 587 | 654 | 0.198 at pH 3.2  | Buffer containing 10% ethanol                  | 5.4  | This work |

## 2. Synthetic route to near-infrared rhodamine dyes A, B and C.

We showed how to prepare rhodamine dyes **A-C**, and characterize the products by NMR and Mass spectrometer.

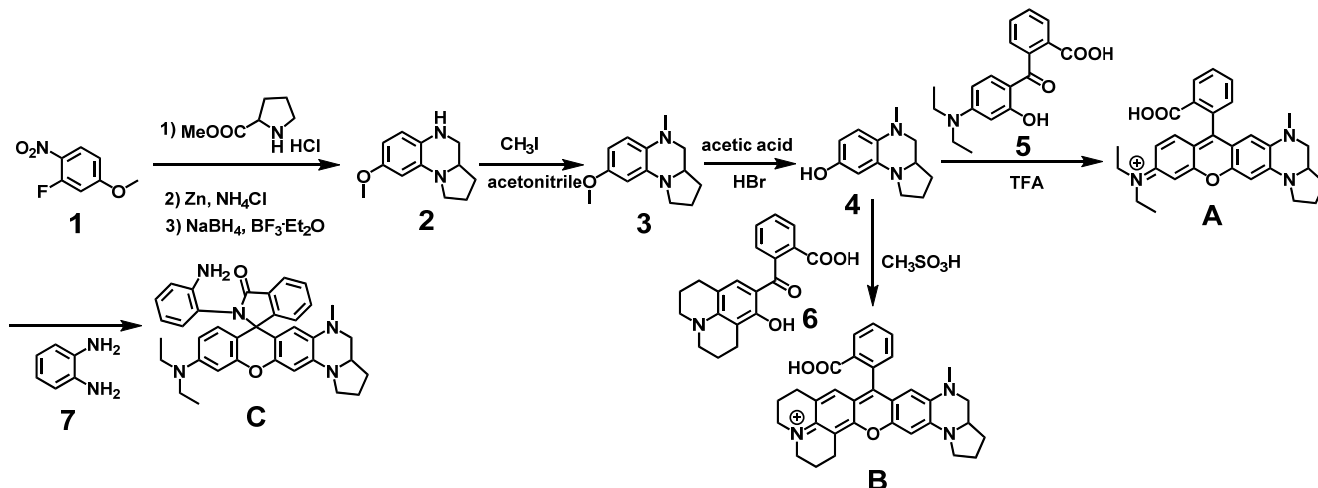

**Scheme S1.** Synthetic approach to prepare rhodamine dyes A-C.

**Synthesis of rhodamine dye A:** After compounds **4**<sup>20</sup> (204 mg, 1 mmol) and **5** (313 mg, 1 mmol) were added to trifluoroacetic acid (10 ml), the mixture was heated under reflux and stirred for 8 hours. When the reaction was cooled down to room temperature, the solvent was removed under reduced pressure. The resulting residue was purified by using flash column chromatography gradient elution with methanol ratio to dichloromethane from 0% to 10%. The rhodamines **A** was obtained as blue solid. <sup>1</sup>H NMR (400 MHz, CD<sub>3</sub>OD) δ 8.30 (d, *J* = 7.7 Hz, 1H), 7.82 (t, *J* = 7.5 Hz, 1H), 7.75 (t, *J* = 7.5 Hz, 1H), 7.36 – 7.38 (m, 1H), 7.09 (d, *J* = 7.8 Hz, 1H), 6.97 (d, *J* = 9.3 Hz, 1H), 6.91 (s, 1H), 6.73 (s, 1H), 5.96 (d, *J* = 3.4 Hz, 1H), 3.57 – 3.74 (m, 4H), 2.77 – 2.91 (m, 2H), 2.67 (s, 3H), 2.22 – 2.26 (m, 3H), 2.02 – 2.07 (m, 2H), 1.56 – 1.59 (m, 2H), 1.26 (t, *J* = 7.1 Hz, 6H).; <sup>13</sup>C NMR (100 MHz, CDCl<sub>3</sub>) δ 171.02, 160.32, 159.12, 157.60, 150.96, 139.80, 138.66, 135.10, 134.17, 133.60, 119.25, 117.17, 106.78, 98.50, 62.26, 56.65, 49.21, 42.21, 33.70, 26.74, 15.65. LCMS(ESI): calculated for C<sub>30</sub>H<sub>32</sub>N<sub>3</sub>O<sub>3</sub> [M]<sup>+</sup>482.2, found 482.5.

**Synthesis of rhodamine dye B:** Rhodamine **B** was prepared in the same way for synthesis of rhodamine **A** by using compounds **4**<sup>20</sup> (337 mg, 1 mmol) and **6**<sup>21</sup> (313 mg, 1 mmol), affording the product as blue solid. <sup>1</sup>H NMR (400 MHz, CDCl<sub>3</sub>) δ: 8.18 (d, *J* = 7.4 Hz, 1H), 7.68 (q, *J* = 6.6 Hz, 2H), 7.32 – 7.23 (m, 1H), 6.72 (d, *J* = 6.5 Hz, 1H), 6.67 (s, 1H), 6.02 (d, *J* = 2.9 Hz, 1H), 3.71 – 3.84 (m, 2H), 3.45 – 3.55 (m, 4H), 3.08 – 2.96 (m, 2H), 2.62 – 2.69 (m, 7H), 2.27 – 2.16 (m, 2H), 2.06 (d, *J* = 5.9 Hz, 3H), 1.96 – 1.83 (m, 2H), 1.62 – 1.47 (m, 2H).; <sup>13</sup>C NMR (100 MHz, CDCl<sub>3</sub>) δ: 155.92, 154.36, 151.61, 149.71, 145.91, 135.44, 134.25, 131.03, 130.50, 129.97, 125.53, 123.79, 114.50, 104.74, 103.83, 94.28, 58.11, 52.60, 50.50, 47.66, 38.35, 29.84, 27.61, 22.90, 20.85, 19.96. LCMS(ESI): calculated for C<sub>32</sub>H<sub>32</sub>N<sub>3</sub>O<sub>3</sub> [M]<sup>+</sup>506.2, found 506.5.

**Synthesis of rhodamine dye C:** After 1,2-diaminobenzene (324 mg, 3 mmol), rhodamines **A** (482 mg, 1 mmol), BOP reagent (530 mg, 1.2 mmol) and triethylamine (2 mL) were added to dry DCM (15 ml), the mixture was stirred at room temperature for 16 hours. Then the mixture was diluted with DCM, washed with water and brine, dried with anhydrous Na<sub>2</sub>SO<sub>4</sub>, filtered and concentrated in vacuo. The resulting residue was purified by using flash column chromatography gradient elution with methanol ratio to dichloromethane from 0% to 5%. The rhodamines **C** was obtained as blue solid. <sup>1</sup>H NMR (400 MHz, CDCl<sub>3</sub>) δ: 7.95 (d, *J* = 7.5, Hz, 1H), 7.67 – 7.56 (m, 2H), 7.24 – 7.16 (m, 1H), 6.89 (d, *J* = 7.7, 1H), 6.57 (d, *J* = 8.1, 2H), 6.42 – 6.16 (m, 3H), 6.04 – 5.89 (m, 2H), 5.78 (s, 1H), 3.74 – 3.65 (m, 1H), 3.32 (d, *J* = 5.3 Hz, 5H), 3.14 (s, 1H), 2.47 (s, 3H), 2.25 – 2.37 (m, 1H), 1.81 – 2.02 (m, 3H), 1.22 – 1.43 (m, 2H), 1.11 (t, *J* = 7.0 Hz, 6H); <sup>13</sup>C NMR (100 MHz, CDCl<sub>3</sub>) δ: 167.26, 154.33, 152.76, 149.06, 137.94, 133.04, 132.98, 131.82, 128.77, 128.69, 128.58, 128.35, 124.43, 122.76, 121.48, 117.28, 116.62, 107.97, 97.95, 96.64, 69.89, 57.03, 54.67, 47.46, 44.22, 38.93, 30.16, 23.53, 11.76. LCMS(ESI): calculated for C<sub>36</sub>H<sub>38</sub>N<sub>5</sub>O<sub>2</sub> [M]<sup>+</sup>572.3, found 572.5.

### 3. <sup>1</sup>H and <sup>13</sup>C NMR spectra of near-infrared rhodamine dyes **A**, **B**, and **C**.

In this section, we showed <sup>1</sup>H and <sup>13</sup>C NMR spectra of probes A-C.

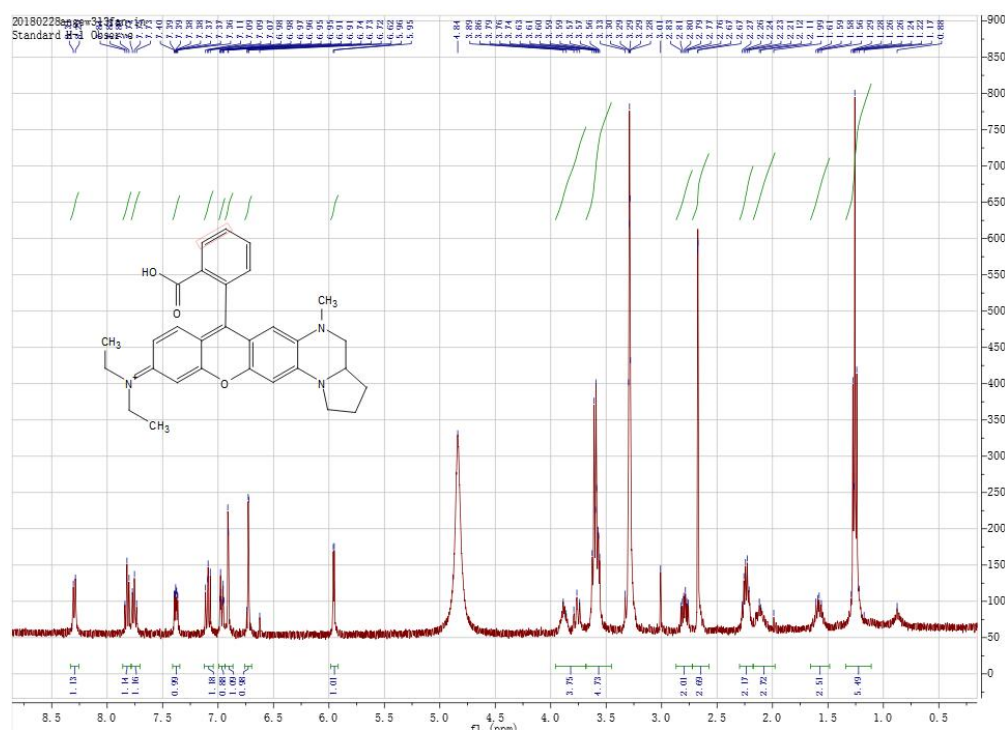

**Figure S1.** <sup>1</sup>H NMR spectrum of rhodamine dye **A** in CD<sub>3</sub>OD solution.







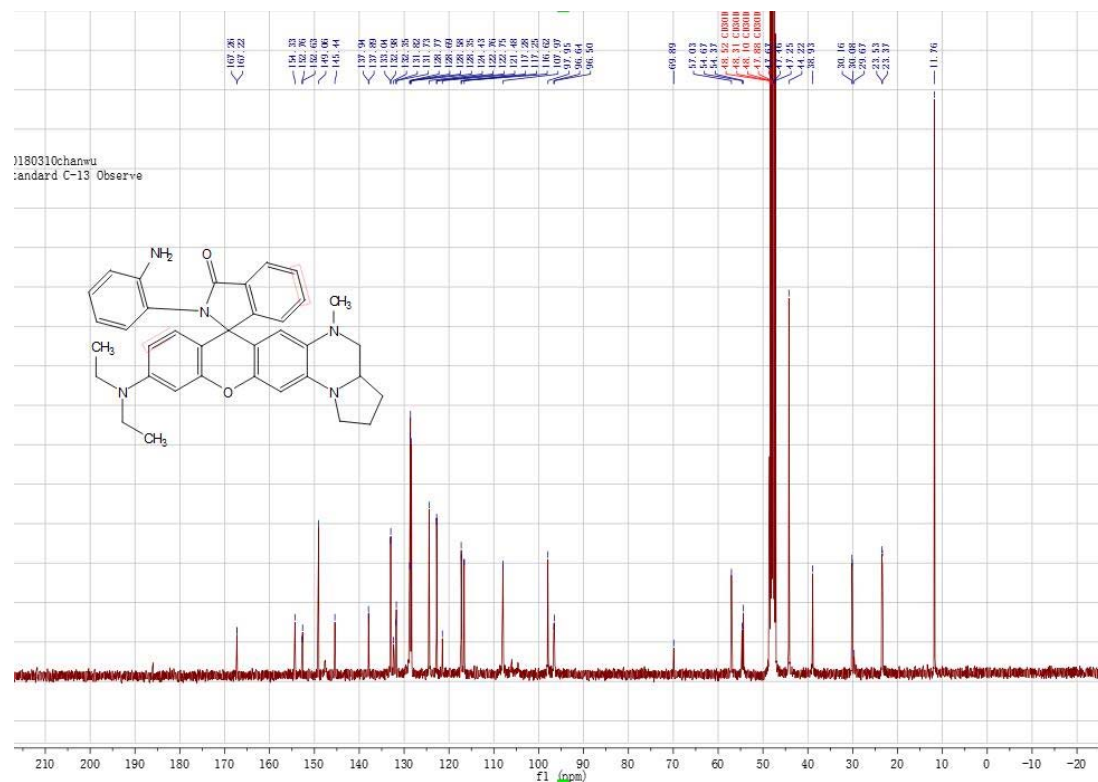

**Figure S6.**  $^{13}\text{C}$  NMR spectrum of rhodamine dye **C** in  $\text{CD}_3\text{OD}$  solution.

#### 4. A fluorescence standard and calculation of fluorescence quantum yields of the rhodamine dyes

We chose a near-infrared rhodamine dye shown below as a fluorescent standard to calculate fluorescence quantum yields of rhodamine dyes **A**, **B** and **C**.

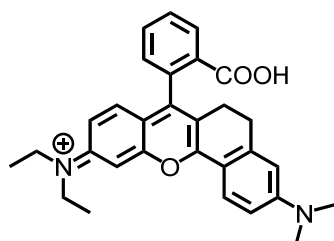

Near-infrared rhodamine dye as a fluorescence standard

The UV-Vis absorption spectra of rhodamine **A**, **B** and **C** were collected in the range from 300 to 800 nm with increments of 1 nm. For the buffers, we prepared citrate-phosphate buffer from pH 2.0 to pH 7.8, and carbonate-bicarbonate buffer for pH 8.8 to pH 11. Their corresponding fluorescence spectra were collected at the excitation wavelength of 550 nm with increments of 1 nm. The excitation and emission slit widths were set to 5 nm. A near-infrared rhodamine dye above<sup>22, 23</sup> was utilized as a reference standard to calculate the fluorescence quantum yields of rhodamine **A**, **B**, and **C** in ethanol and buffer solutions. The standard dye with a fluorescence quantum yield 37% in pH 7.4 PBS buffer with 10% ethanol was used. The absorbance was kept between 0.05 and 0.1 in order to obtain optimized data. All the samples and references were freshly prepared under identical conditions. The fluorescence quantum yields were calculated according to literature<sup>4</sup> using the equation below<sup>24</sup>:

$$\phi_X = \phi_{st} (Grad_X / Grad_{st}) (\eta_X^2 / \eta_{st}^2)$$

Where  $\Phi$  is the fluorescence quantum yield, the subscripts 'st' and 'X' stand for standard and test, respectively, "Grad" represents the gradient from the plot of integrated fluorescence intensity versus absorbance and  $\eta$  is the refractive index of the solvent.

We investigated effect of ethanol percentage in water-ethanol mixed solution on dye fluorescence intensity (Figure S7-S9). Increase of ethanol percentages from 1% to 60% causes the dye fluorescence intensity increases to reduce dye aggregation in aqueous solutions.

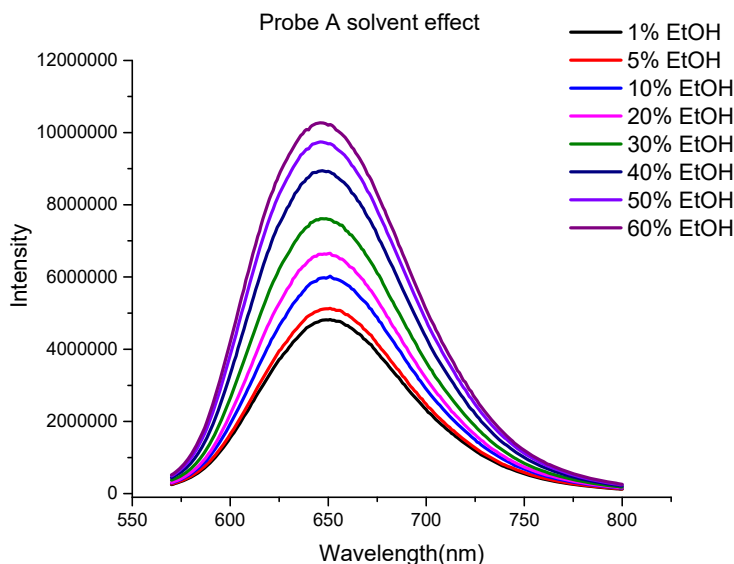

**Figure S7.** Fluorescence spectra of rhodamine dye **A** in 10 mM pH 7.4 buffers with different percentages of ethanol in ethanol and water mixed solution.

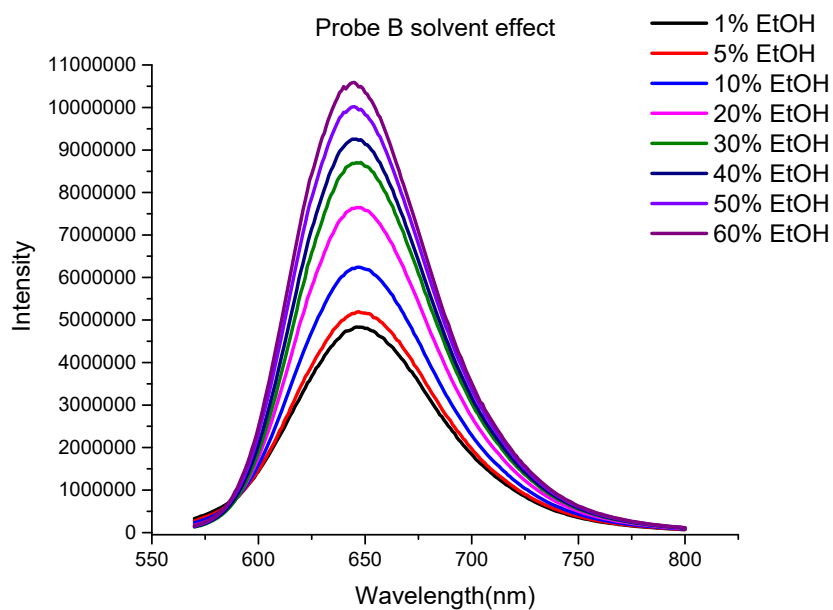

**Figure S8.** Fluorescence spectra of rhodamine dye **B** in 10 mM pH 7.4 buffers with different percentages of ethanol in ethanol and water mixed solution.

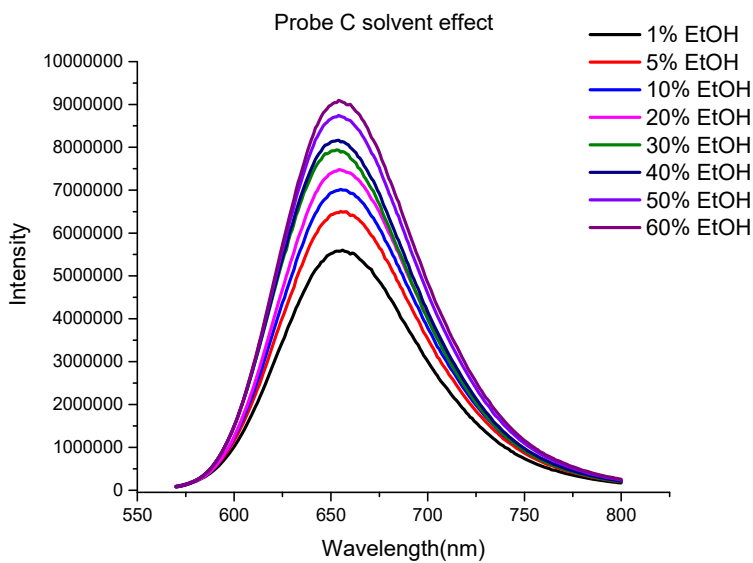

**Figure S9.** Fluorescence spectra of rhodamine dye **C** in 10 mM pH 2.4 buffers with different percentages of ethanol in ethanol and water mixed solution.

## 5. Determination of pK<sub>a</sub> by fluorometric titration

pK<sub>a</sub> of rhodamine dye **C** was obtained by using the equation below<sup>25</sup> through fluorometric titration as a function of pH, which was obtained by using the fluorescence spectra. The expression of the steady-state fluorescence intensity  $F$  as a function of the proton concentration has been extended for the case of  $n$ : 1 complex between  $H^+$  and a fluorescent dye.

$$F = \frac{F_{\min}[H^+]^n + F_{\max}K_a}{K_a + [H^+]^n}$$

$F_{\min}$  and  $F_{\max}$  stand for the fluorescence intensities at maximal and minimal  $H^+$  concentrations, respectively while  $n$  is apparent stoichiometry of  $H^+$  binding to the rhodamine dye **C**. Nonlinear fitting of equation expressed above to the fluorescence titration data was plotted as a function of  $H^+$  concentration.

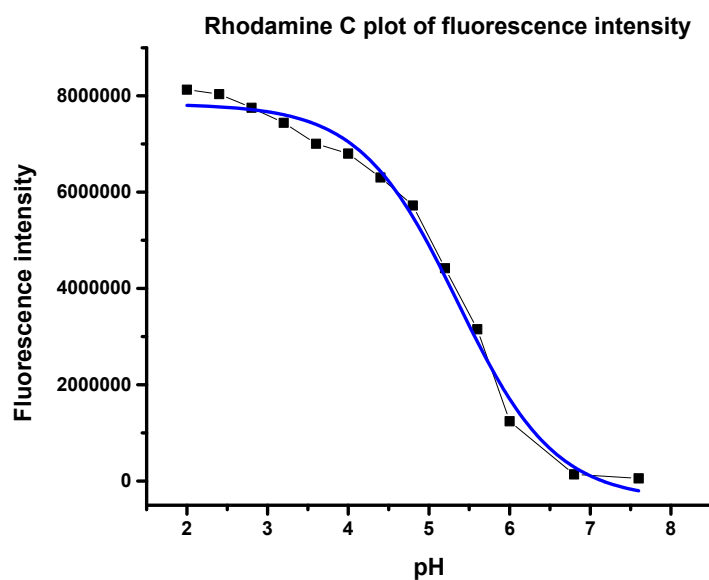

**Figure S10.** Plot curve of fluorescence intensity of rhodamine dye **C** versus pH

## 6. Dye stability and selectivity

We investigated fluorescence intensity of rhodamine dyes **A**, **B** and **C** under different excitation time, and study selectivity of rhodamine **C** to pH over different cations, anions, and amino acids. Rhodamine dyes **A-C** show excellent photo stability, and rhodamine **C** displays high selectivity to pH over cations, anions and amino acids.

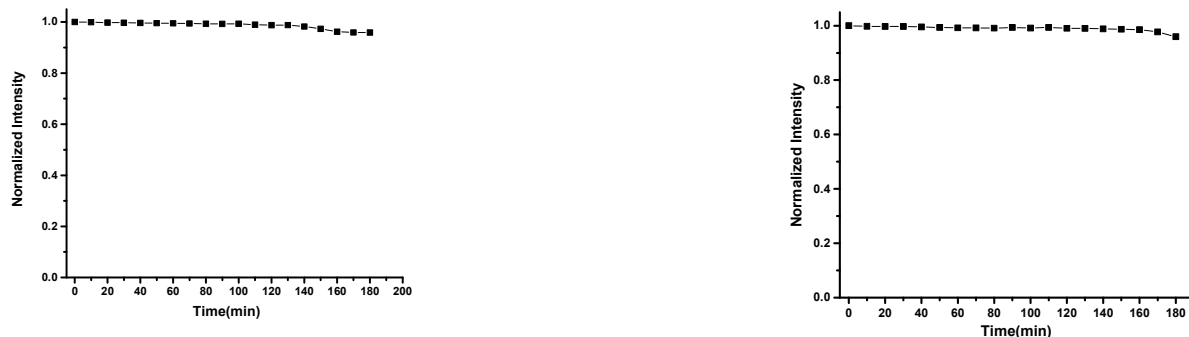

**Figure S11.** Fluorescence intensity of rhodamine dyes **A** (left) and **B** (right) versus excitation time in 10 mM pH 5.0 buffers

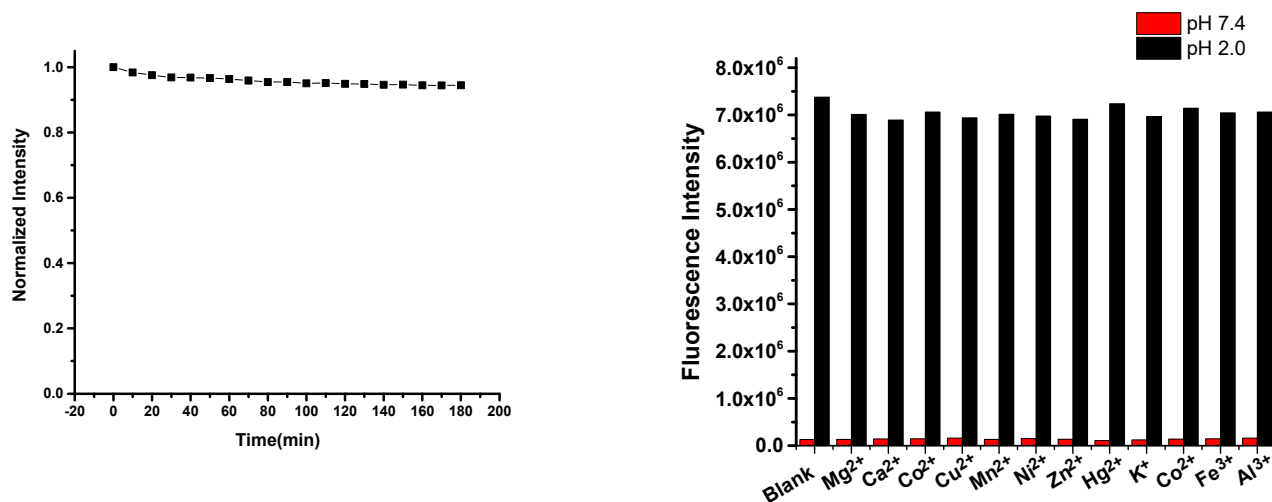

**Figure S12.** Fluorescence intensity of rhodamine dye **C** versus excitation time in 10 mM pH 2.0 buffer (left), and fluorescence responses (right) of rhodamine dye **C** to different metal ions in 10 mM buffers at pH 7,4 and 2.0 under excitation of 550 nm.

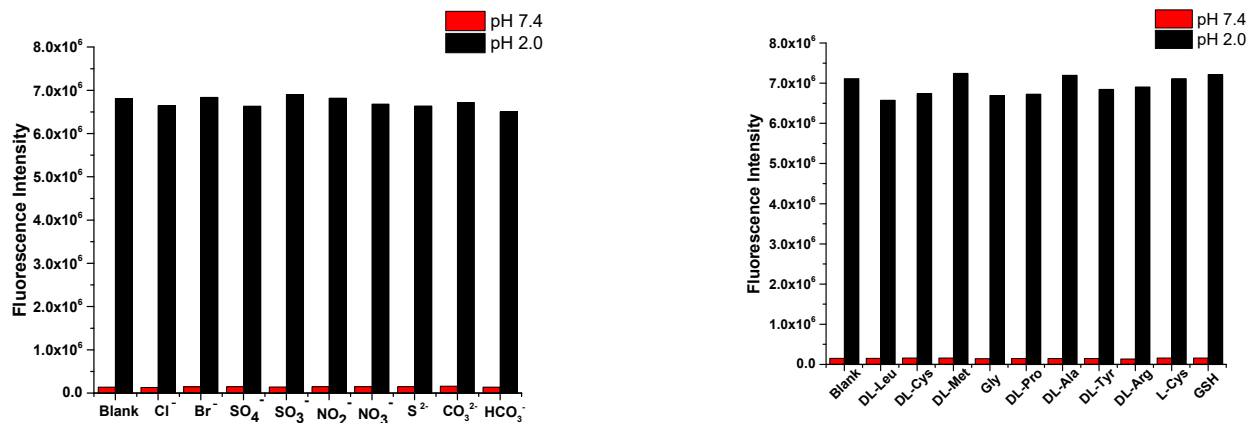

**Figure S13.** Fluorescence responses of rhodamine dye **C** to different anions and amino acids in 10 mM buffers at pH 7,4 and 2.0 under excitation of 550 nm.

### 7. Computationally derived structures for rhodamine dyes A-D.

The structures of rhodamine probes A-D were constructed using Avogadro<sup>26, 27</sup> and GaussView.<sup>28</sup> Structures were initially optimized using the capabilities within these aforementioned programs. Calculations were then conducted using density functional theory (DFT) with spherical atom dispersion terms, namely APFD,<sup>29</sup> with all electron basis sets at the 6-311+G(2d, p)<sup>30-32</sup> level implemented using the Gaussian16 suite of programs<sup>33</sup> for the full geometry optimization and frequency calculations of the probes. Imaginary frequencies were not obtained in any of the frequency calculations. The first six excited states were assessed on the basis of TD-DFT optimizations<sup>34</sup> in a Polarizable Continuum Model (PCM) of water.<sup>35</sup> Results were interpreted using Chemission<sup>36</sup> for the UV-plots and GaussView<sup>28</sup> for all other data and figures. The diagrams and listings of atomic positions from the calculations are listed sequentially for rhodamine dyes A-D below and all data are within the PCM matrix of water.

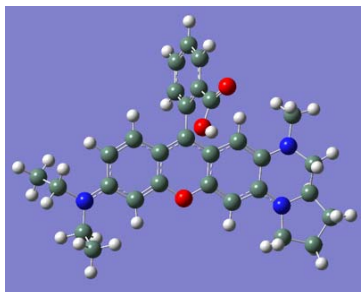

**Figure S14.** Drawing of rhodamine dye A with atoms represented as spheres of arbitrary size (H-white, C-grey, N-blue and O-red) using the GaussView<sup>28</sup> program.

**Table S1.** Atomic coordinates for rhodamine dye A.

| Row | Symbol | X        | Y        | Z        |    |   |          |          |          |
|-----|--------|----------|----------|----------|----|---|----------|----------|----------|
|     |        |          |          |          | 35 | H | 0.209544 | 1.426127 | 3.176885 |
| 1   | C      | 2.9186   | -1.43723 | -0.31593 | 36 | C | -7.28865 | -0.59408 | -1.15275 |
| 2   | C      | 1.627969 | -1.97698 | -0.22453 | 37 | H | -8.25278 | -0.10424 | -0.99639 |
| 3   | C      | 0.532581 | -1.14906 | -0.24277 | 38 | H | -6.64291 | 0.089628 | -1.70869 |
| 4   | C      | 0.660267 | 0.258562 | -0.33456 | 39 | H | -7.45427 | -1.48012 | -1.77067 |
| 5   | C      | 1.970222 | 0.794538 | -0.40591 | 40 | H | 2.071821 | 1.868971 | -0.46185 |
| 6   | C      | 3.089058 | 0.002094 | -0.40136 | 41 | H | 1.476886 | -3.04622 | -0.16029 |
| 7   | C      | -0.50134 | 1.033538 | -0.31166 | 42 | H | -2.99153 | 2.170122 | -0.19892 |
| 8   | C      | -1.75166 | 0.405999 | -0.2268  | 43 | H | -5.09163 | 0.989328 | -0.05336 |
| 9   | C      | -1.81101 | -1.00644 | -0.16436 | 44 | H | 3.991592 | 2.427257 | -1.20661 |
| 10  | C      | -2.99162 | -1.70334 | -0.07567 | 45 | H | 5.606896 | 2.160578 | -0.55035 |
| 11  | H      | -2.93883 | -2.78101 | -0.01166 | 46 | H | 4.224802 | 2.343549 | 0.554111 |
| 12  | C      | -4.21905 | -1.01167 | -0.03746 | 47 | C | 3.98075  | -3.66511 | -0.1208  |
| 13  | C      | -4.17397 | 0.418345 | -0.07861 | 48 | C | 5.460254 | -4.05129 | -0.14631 |
| 14  | C      | -2.99116 | 1.086681 | -0.16733 | 49 | H | 6.125656 | -2.61749 | 1.34403  |
| 15  | N      | 4.371741 | 0.500232 | -0.48887 | 50 | H | 7.228148 | -2.74221 | -0.03846 |
| 16  | N      | 3.996547 | -2.22124 | -0.33075 | 51 | N | -5.39376 | -1.6671  | 0.037769 |
| 17  | C      | -5.46609 | -3.12009 | -0.01831 | 52 | H | -7.33168 | -1.64392 | 0.734323 |
| 18  | C      | -6.66708 | -0.97413 | 0.183902 | 53 | H | -6.53323 | -0.09881 | 0.821374 |
| 19  | C      | 5.407718 | -0.30638 | 0.134967 | 54 | H | -6.43092 | -3.37591 | -0.46193 |
| 20  | C      | 5.355802 | -1.69853 | -0.44251 | 55 | H | 5.28586  | -0.34378 | 1.227718 |
| 21  | C      | 6.179658 | -2.76461 | 0.260388 | 56 | H | 6.377026 | 0.143106 | -0.0819  |
| 22  | O      | -0.67735 | -1.74405 | -0.16973 | 57 | H | 5.671473 | -4.8902  | 0.517067 |
| 23  | C      | 4.551324 | 1.931599 | -0.41117 | 58 | H | 5.75547  | -4.34168 | -1.1581  |
| 24  | H      | 5.628165 | -1.65344 | -1.50543 | 59 | H | -0.95497 | 4.903802 | -2.75882 |
| 25  | C      | -0.41184 | 2.50711  | -0.41402 | 60 | H | -0.05601 | 6.3372   | -0.93978 |
| 26  | C      | 0.091567 | 3.319675 | 0.61159  | 61 | H | 0.62142  | 5.298949 | 1.210812 |
| 27  | C      | -0.78135 | 3.095913 | -1.62116 | 62 | H | 3.515945 | -3.88396 | 0.846699 |
| 28  | C      | 0.224673 | 4.691458 | 0.405626 | 63 | H | 3.398617 | -4.16693 | -0.89843 |
| 29  | C      | -0.65954 | 4.46529  | -1.8117  | 64 | C | -5.32474 | -3.77154 | 1.35089  |
| 30  | H      | -1.15595 | 2.465755 | -2.42059 | 65 | H | -4.36092 | -3.53297 | 1.806236 |
| 31  | C      | -0.15434 | 5.266983 | -0.7959  | 66 | H | -6.11189 | -3.42898 | 2.027122 |
| 32  | C      | 0.511527 | 2.807088 | 1.941343 | 67 | H | -5.40223 | -4.85783 | 1.262586 |
| 33  | O      | 1.344485 | 3.347713 | 2.632377 | 68 | H | -4.70934 | -3.49068 | -0.71261 |
| 34  | O      | -0.14253 | 1.702128 | 2.316864 |    |   |          |          |          |

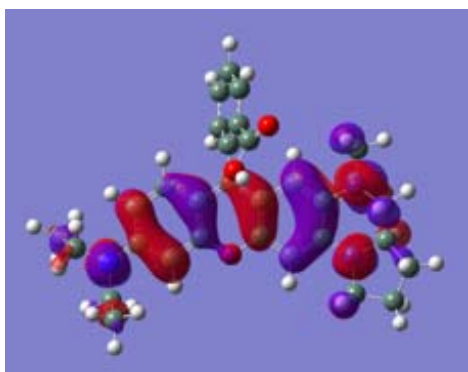

HOMO

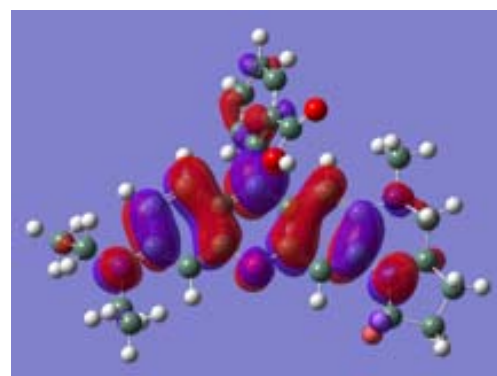

LUMO

**Figure S15.** The HOMO and LUMO for rhodamine dye **A**.

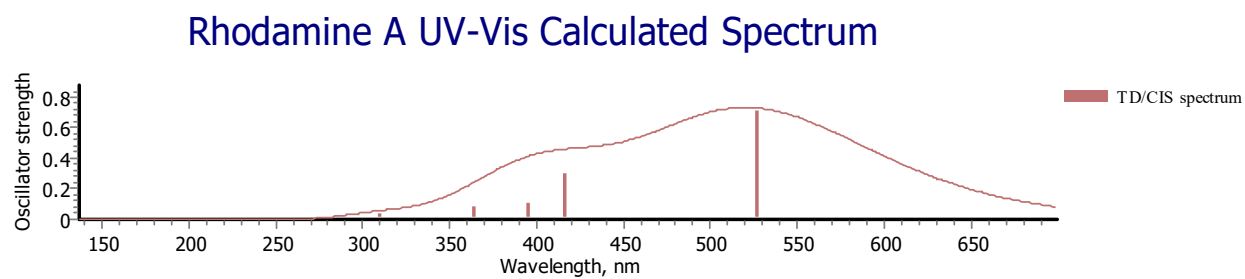

| Energy[nm] | Oscillator Strength |
|------------|---------------------|
| 526.3186   | 0.7013              |
| 416.0985   | 0.2919              |
| 394.9695   | 0.0981              |
| 363.4748   | 0.0816              |
| 318.7845   | 0.0118              |
| 309.9002   | 0.0366              |

**Figure S16.** Calculated UV-Vis spectrum for rhodamine dye **A** and listing of peak positions with oscillator strengths. This represents a HOMO-LUMO transition.



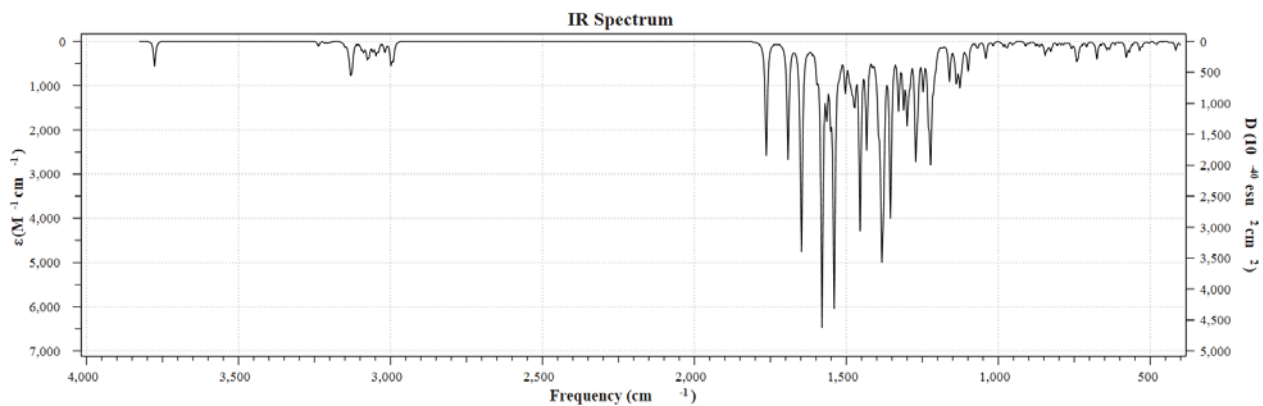

**Figure S17.** Calculated FTIR spectrum of rhodamine dye **A**.

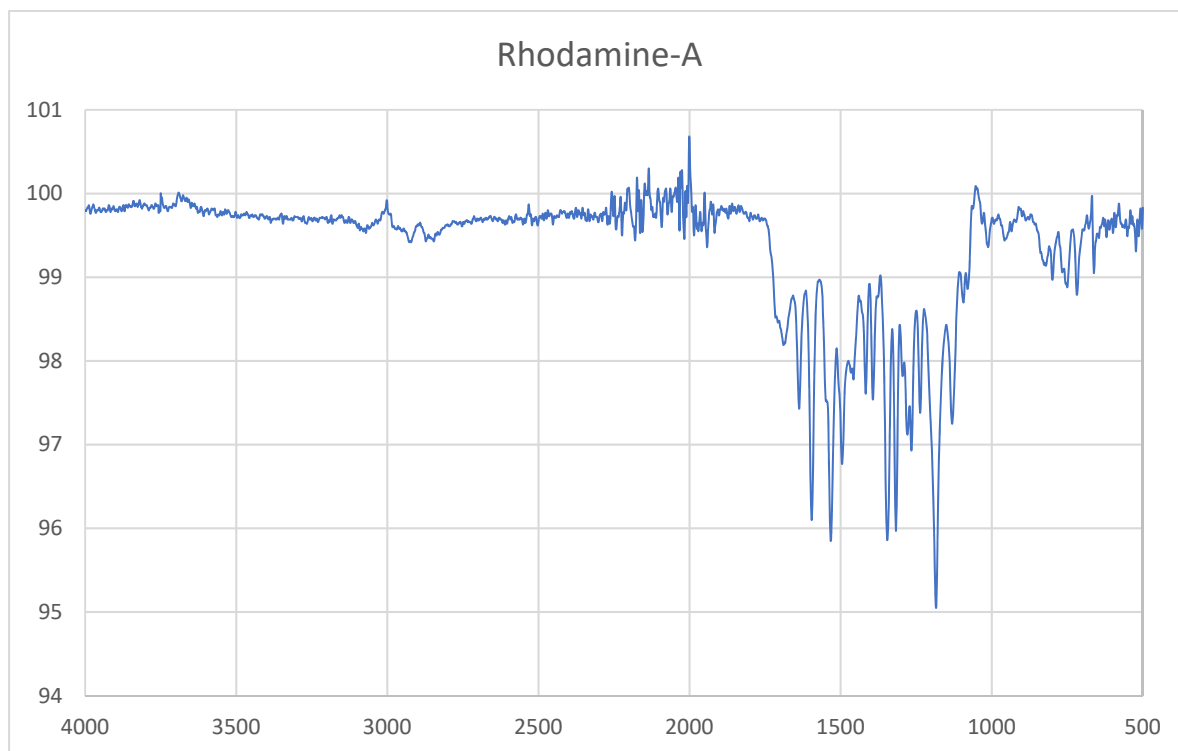

**Figure S18.** The solid state FTIR spectrum of rhodamine dye **A**.

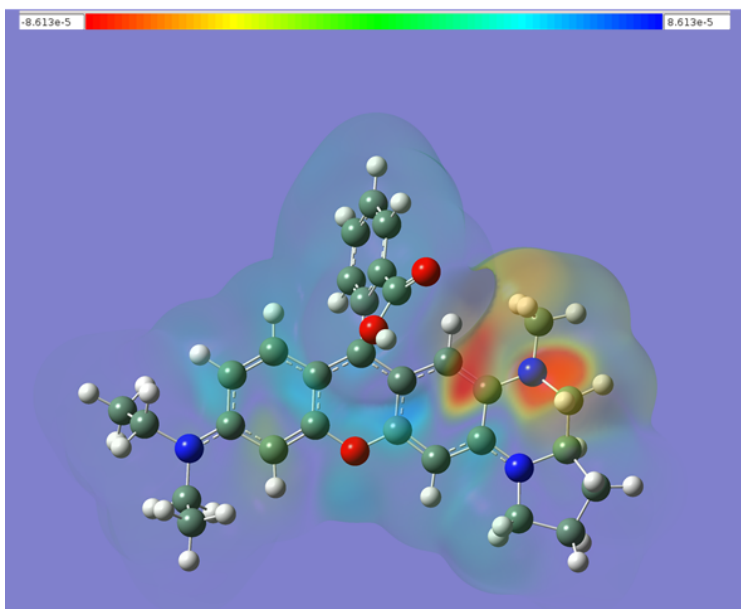

**Figure S19.** Current density difference plot for rhodamine dye **A** obtained by subtracting the SCF (ground state) density from the CI (excited state) density using the Cubegen program in GaussView.

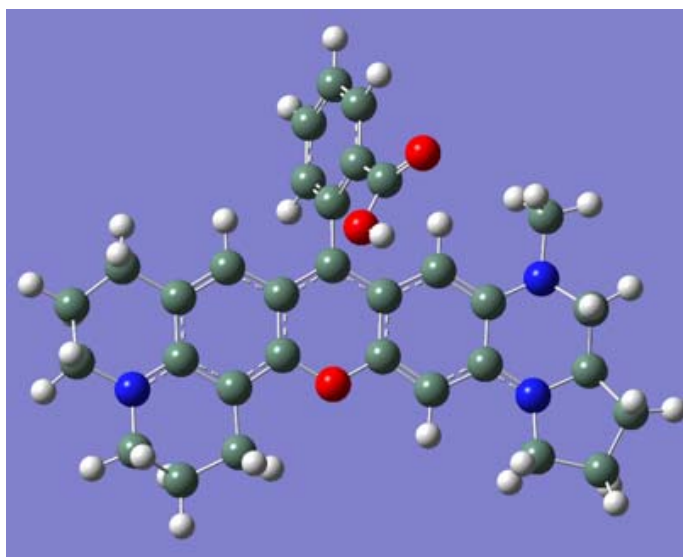

**Figure S20.** Drawing of rhodamine dye **B** with atoms represented as spheres of arbitrary size (H-white, C-grey, N-blue and O-red) using the GaussView<sup>28</sup> program.

**Table S2.** Atomic coordinates for rhodamine dye B.

| Row | Symbol | X        | Y        | Z        |    |   |          |          |          |
|-----|--------|----------|----------|----------|----|---|----------|----------|----------|
|     |        |          |          |          | 36 | O | -0.06281 | 1.785167 | 2.29229  |
|     |        |          |          |          | 37 | H | 0.317098 | 1.55635  | 3.154362 |
| 1   | C      | 3.106163 | -1.29763 | -0.26362 | 38 | C | -6.48255 | -1.23361 | 0.262825 |
| 2   | C      | 1.843912 | -1.89282 | -0.14255 | 39 | H | 2.103311 | 1.957617 | -0.51832 |
| 3   | C      | 0.70959  | -1.11683 | -0.17906 | 40 | H | 1.742742 | -2.96501 | -0.03991 |
| 4   | C      | 0.770031 | 0.288652 | -0.31919 | 41 | H | -2.9489  | 2.042014 | -0.19387 |
| 5   | C      | 2.052011 | 0.882301 | -0.42338 | 42 | C | -5.38855 | 0.973902 | 0.087679 |
| 6   | C      | 3.207119 | 0.142983 | -0.40294 | 43 | H | 3.985707 | 2.579848 | -1.29935 |
| 7   | C      | -0.43003 | 1.007281 | -0.30985 | 44 | H | 5.617908 | 2.41291  | -0.65193 |
| 8   | C      | -1.64694 | 0.326526 | -0.19197 | 45 | H | 4.238666 | 2.566471 | 0.460538 |
| 9   | C      | -1.64156 | -1.08457 | -0.08506 | 46 | C | 4.275058 | -3.46272 | 0.013006 |
| 10  | C      | -2.7865  | -1.84448 | 0.020606 | 47 | C | 5.771222 | -3.77957 | -0.00356 |
| 11  | C      | -4.03243 | -1.17526 | 0.052413 | 48 | H | 6.373499 | -2.25488 | 1.421457 |
| 12  | C      | -4.07086 | 0.260066 | -0.01203 | 49 | H | 7.475365 | -2.38481 | 0.039042 |
| 13  | C      | -2.90963 | 0.959409 | -0.14165 | 50 | N | -5.18325 | -1.87878 | 0.145272 |
| 14  | N      | 4.465047 | 0.698149 | -0.52281 | 51 | H | -5.10504 | -3.50365 | 1.466278 |
| 15  | N      | 4.221965 | -2.03071 | -0.25781 | 52 | H | -6.12139 | -3.71289 | 0.040571 |
| 16  | C      | -5.16632 | -3.31311 | 0.386049 | 53 | H | 5.424206 | -0.03428 | 1.220241 |
| 17  | C      | -4.01214 | -3.97565 | -0.33699 | 54 | H | 6.486559 | 0.453265 | -0.11272 |
| 18  | H      | -4.01532 | -5.04724 | -0.1256  | 55 | H | 6.024279 | -4.57862 | 0.69359  |
| 19  | H      | -4.14765 | -3.85344 | -1.4166  | 56 | H | 6.076714 | -4.09849 | -1.00367 |
| 20  | C      | -2.70126 | -3.34279 | 0.0994   | 57 | H | -1.10158 | 4.768613 | -2.87567 |
| 21  | C      | 5.540524 | -0.03342 | 0.126084 | 58 | H | -0.24043 | 6.302347 | -1.12094 |
| 22  | C      | 5.553473 | -1.44819 | -0.39669 | 59 | H | 0.519374 | 5.369169 | 1.049848 |
| 23  | C      | 6.430156 | -2.44418 | 0.344494 | 60 | H | 3.823743 | -3.663   | 0.991105 |
| 24  | O      | -0.46967 | -1.76328 | -0.07317 | 61 | H | 3.715734 | -4.02523 | -0.73969 |
| 25  | C      | 4.57586  | 2.138266 | -0.49409 | 62 | H | -1.87553 | -3.69938 | -0.52042 |
| 26  | H      | 5.82192  | -1.43099 | -1.46157 | 63 | H | -2.46358 | -3.64466 | 1.127095 |
| 27  | C      | -0.4103  | 2.479135 | -0.46296 | 64 | C | -6.51052 | 0.102074 | -0.44959 |
| 28  | C      | 0.071658 | 3.348397 | 0.525805 | 65 | H | -5.33251 | 1.927176 | -0.44336 |
| 29  | C      | -0.82566 | 3.010069 | -1.68211 | 66 | H | -5.59078 | 1.212107 | 1.139825 |
| 30  | C      | 0.13793  | 4.717244 | 0.272478 | 67 | H | -7.48388 | 0.573416 | -0.29616 |
| 31  | C      | -0.77075 | 4.376271 | -1.91999 | 68 | H | -6.3856  | -0.05477 | -1.52624 |
| 32  | H      | -1.18411 | 2.336587 | -2.45307 | 69 | H | -7.22097 | -1.91572 | -0.16424 |
| 33  | C      | -0.28685 | 5.234183 | -0.94027 | 70 | H | -6.73518 | -1.10662 | 1.324611 |
| 34  | C      | 0.537478 | 2.901302 | 1.863856 |    |   |          |          |          |
| 35  | O      | 1.360378 | 3.500078 | 2.518295 |    |   |          |          |          |

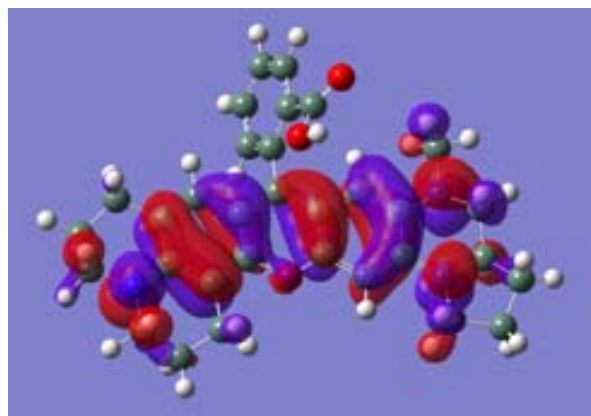

HOMO

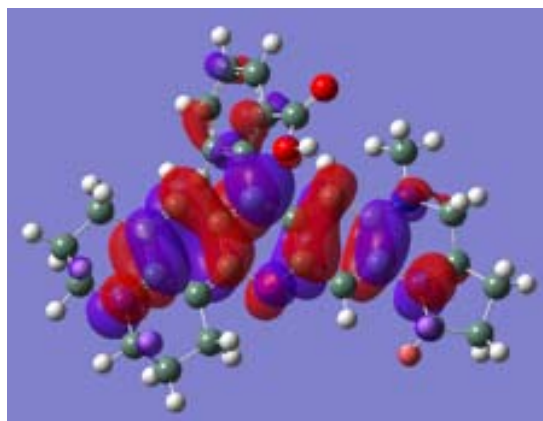

LUMO

**Figure S21.** The HOMO and LUMO for rhodamine dye **B**.

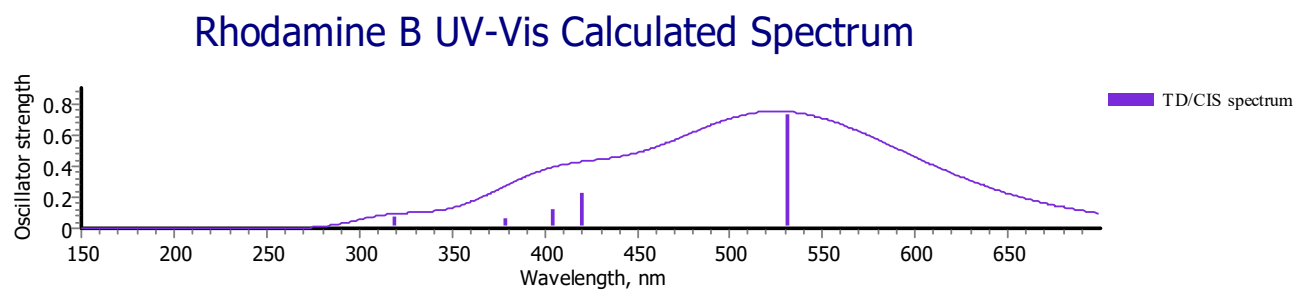

| Energy[nm] | Oscillator Strength |
|------------|---------------------|
| 530.6436   | 0.7265              |
| 420.0314   | 0.2276              |
| 403.8727   | 0.1180              |
| 378.6607   | 0.0533              |
| 325.7616   | 0.0227              |
| 319.0717   | 0.0652              |

**Figure S22.** Calculated UV-Vis spectrum for rhodamine dye **B** and listing of peak positions with oscillator strengths. This represents a HOMO-LUMO transition.

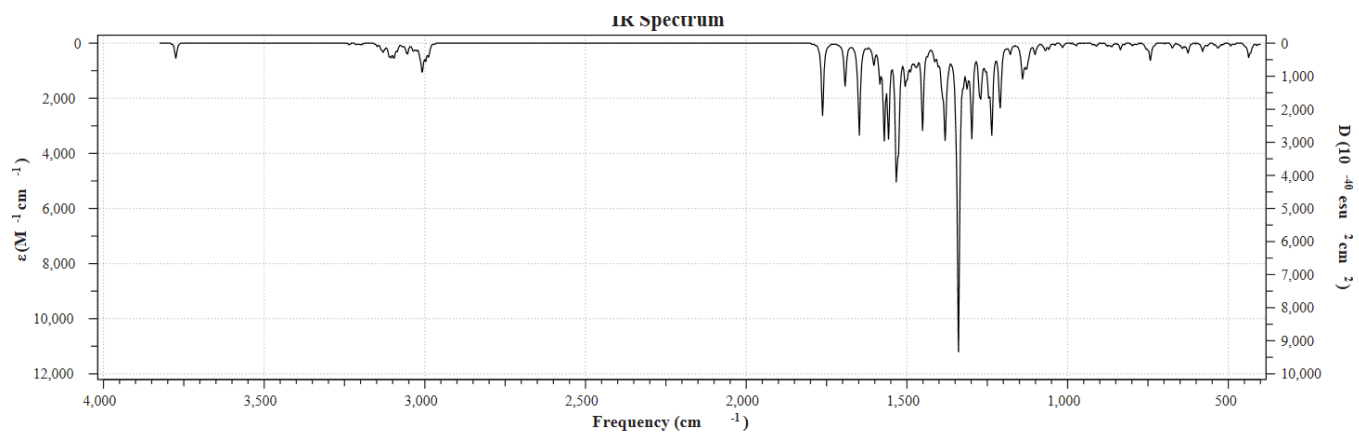

**Figure S23.** Calculated FTIR spectrum of rhodamine dye **B**.

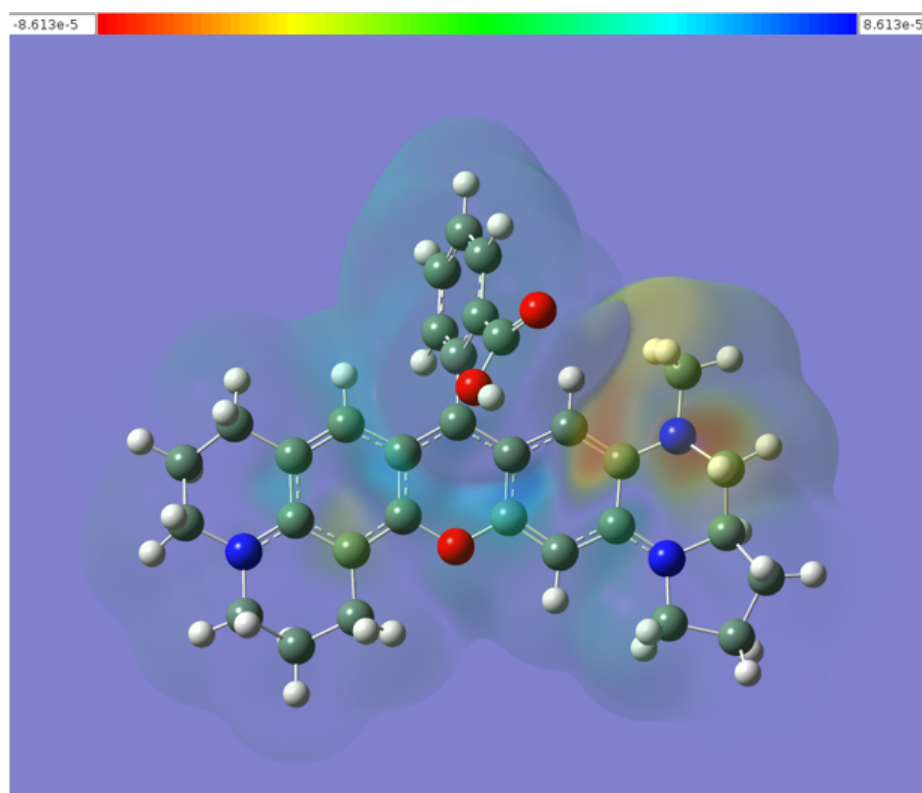

**Figure S24.** Current density difference plot for rhodamine dye **B** obtained by subtracting the SCF (ground state) density from the CI (excited state) density using the Cubegen program in GaussView.

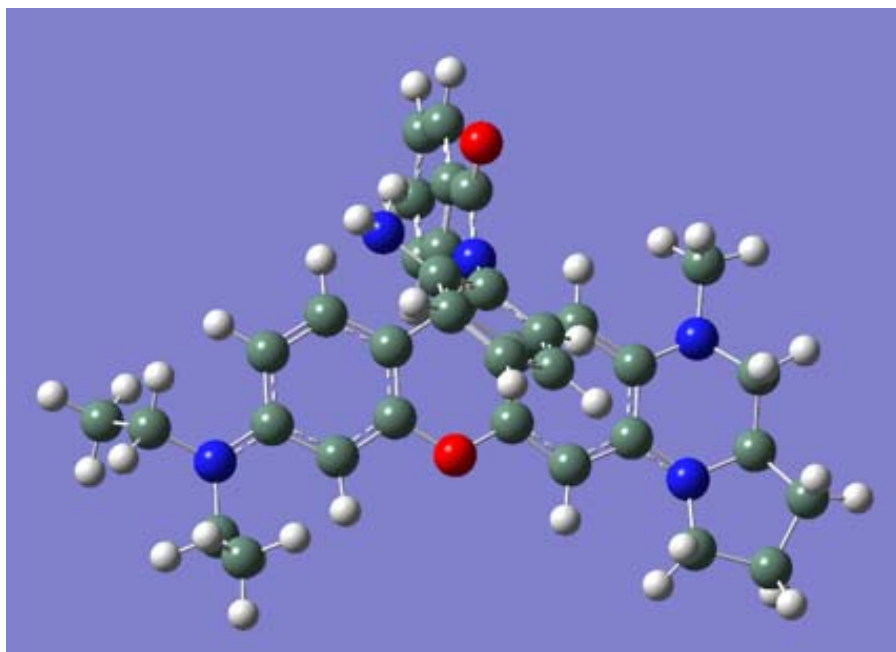

**Figure S25.** Drawing of rhodamine dye C with atoms represented as spheres of arbitrary size (H-white, C-grey, N-blue and O-red) using the GaussView<sup>28</sup> program.

**Table S3.** Atomic coordinates for rhodamine dye C.

| Row | Symbol | X        | Y        | Z        |    |   |          |          |          |
|-----|--------|----------|----------|----------|----|---|----------|----------|----------|
|     |        |          |          |          | 41 | C | 5.949341 | -3.7234  | -0.57867 |
| 1   | C      | 3.284816 | -1.22417 | -0.7192  | 42 | H | 6.411011 | -2.38127 | 1.059311 |
| 2   | C      | 2.027323 | -1.82252 | -0.71884 | 43 | H | 7.634636 | -2.34873 | -0.22206 |
| 3   | C      | 0.872419 | -1.05217 | -0.63431 | 44 | N | -5.01635 | -2.016   | -0.95977 |
| 4   | C      | 0.933231 | 0.324225 | -0.54501 | 45 | H | -5.84364 | -3.75043 | -1.70384 |
| 5   | C      | 2.198981 | 0.924916 | -0.52696 | 46 | H | -4.10347 | -3.69864 | -1.7849  |
| 6   | C      | 3.370976 | 0.200555 | -0.6184  | 47 | H | 5.427557 | -0.20882 | 1.077694 |
| 7   | C      | -0.29928 | 1.141932 | -0.28719 | 48 | H | 6.61472  | 0.48332  | -0.0448  |
| 8   | C      | -1.53141 | 0.321362 | -0.54674 | 49 | H | 6.156575 | -4.60275 | 0.03275  |
| 9   | C      | -1.47319 | -1.06412 | -0.64862 | 50 | H | 6.330536 | -3.91839 | -1.58549 |
| 10  | C      | -2.61175 | -1.84575 | -0.78317 | 51 | H | -0.22004 | 4.142373 | -3.94921 |
| 11  | C      | -3.88569 | -1.25897 | -0.83039 | 52 | H | -0.27748 | 6.05017  | -2.39124 |
| 12  | C      | -3.94788 | 0.15374  | -0.74668 | 53 | H | -0.34581 | 5.657826 | 0.075204 |
| 13  | C      | -2.79961 | 0.898497 | -0.60147 | 54 | H | 3.950685 | -3.66829 | 0.30453  |
| 14  | N      | 4.639399 | 0.787641 | -0.61952 | 55 | H | 3.945733 | -3.92668 | -1.44657 |
| 15  | N      | 4.424509 | -1.96102 | -0.8261  | 56 | C | -6.87014 | -0.94888 | -2.22529 |
| 16  | C      | -4.95353 | -3.45249 | -1.14283 | 57 | H | -7.01002 | -2.19281 | -0.46749 |
| 17  | C      | -4.88168 | -4.22596 | 0.169251 | 58 | H | -6.33665 | -0.61762 | -0.15056 |
| 18  | C      | 5.656324 | -0.03537 | 0.01343  | 59 | H | -6.91912 | -1.77449 | -2.94039 |
| 19  | C      | 5.747923 | -1.3575  | -0.71504 | 60 | H | -6.22373 | -0.1759  | -2.64791 |
| 20  | C      | 6.565372 | -2.43974 | -0.02375 | 61 | H | -7.87584 | -0.53303 | -2.11855 |
| 21  | O      | -0.30013 | -1.76008 | -0.61837 | 62 | H | -5.75969 | -4.02029 | 0.787447 |
| 22  | C      | 4.716403 | 2.192365 | -0.29444 | 63 | H | -3.99422 | -3.94825 | 0.742891 |
| 23  | H      | 6.15106  | -1.17046 | -1.7203  | 64 | H | -4.84441 | -5.30248 | -0.01858 |
| 24  | C      | -0.29141 | 2.446101 | -1.04437 | 65 | H | -2.47428 | -2.9176  | -0.83399 |
| 25  | C      | -0.32214 | 3.518865 | -0.17284 | 66 | H | -4.8984  | 0.667019 | -0.80328 |
| 26  | C      | -0.25199 | 2.646056 | -2.41243 | 67 | H | -2.88251 | 1.978284 | -0.52375 |
| 27  | C      | -0.3192  | 4.829759 | -0.62511 | 68 | C | -0.43513 | 0.768777 | 2.222952 |
| 28  | C      | -0.24864 | 3.956039 | -2.88049 | 69 | C | 0.589556 | -0.13773 | 2.48223  |
| 29  | H      | -0.22471 | 1.806205 | -3.09892 | 70 | C | 0.455105 | -1.10444 | 3.467227 |
| 30  | C      | -0.28157 | 5.039351 | -1.9974  | 71 | C | -0.71817 | -1.14972 | 4.213669 |
| 31  | C      | -0.36524 | 3.00944  | 1.212669 | 72 | C | -1.72553 | -0.2252  | 3.993891 |
| 32  | O      | -0.45333 | 3.662524 | 2.251394 | 73 | C | -1.60723 | 0.755431 | 3.001357 |
| 33  | N      | -0.31542 | 1.655195 | 1.127038 | 74 | N | -2.63996 | 1.644998 | 2.757529 |
| 34  | C      | -6.34143 | -1.43182 | -0.87972 | 75 | H | -2.62856 | -0.25219 | 4.597308 |
| 35  | H      | 2.242044 | 2.000788 | -0.40892 | 76 | H | 1.258446 | -1.80869 | 3.653239 |
| 36  | H      | 1.925196 | -2.89781 | -0.79606 | 77 | H | -0.84436 | -1.90065 | 4.987427 |
| 37  | H      | 4.133469 | 2.780268 | -1.00605 | 78 | H | 1.496469 | -0.07916 | 1.892058 |
| 38  | H      | 5.755675 | 2.513167 | -0.3672  | 79 | H | -2.33335 | 2.583324 | 2.534044 |
| 39  | H      | 4.350749 | 2.416286 | 0.719886 | 80 | H | -3.34001 | 1.661749 | 3.485865 |
| 40  | C      | 4.457084 | -3.40087 | -0.63364 |    |   |          |          |          |

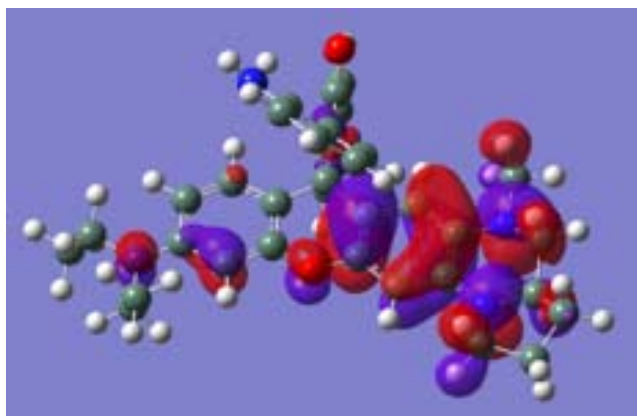

HOMO

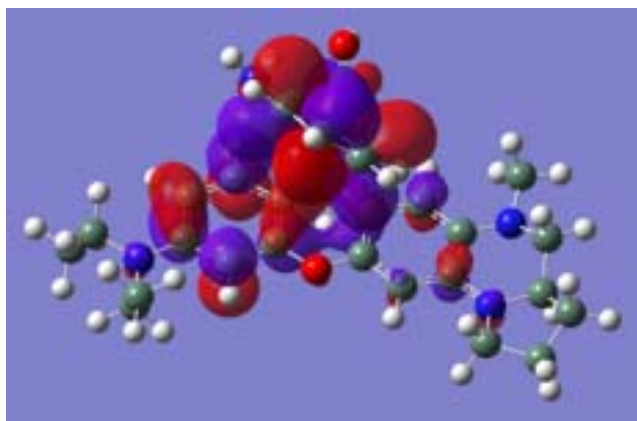

LUMO

**Figure S26.** The HOMO and LUMO+4 (see Fig. S31) for rhodamine dye C.

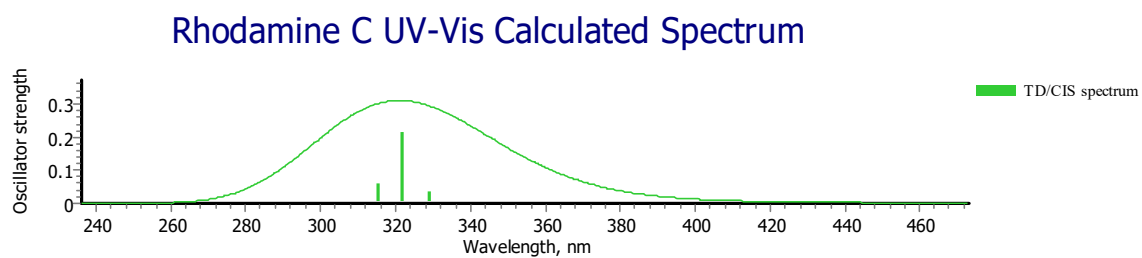

| Energy[nm] | Oscillator Strength |
|------------|---------------------|
| 400.2094   | 0.0038              |
| 358.5761   | 0.0014              |
| 328.9509   | 0.0354              |
| 321.7795   | 0.2127              |
| 315.2746   | 0.0568              |
| 309.0890   | 0.0100              |

**Figure S27.** Calculated UV-Vis spectrum for rhodamine dye C and listing of peak positions with oscillator strengths. This represents a HOMO-LUMO+4 transition.



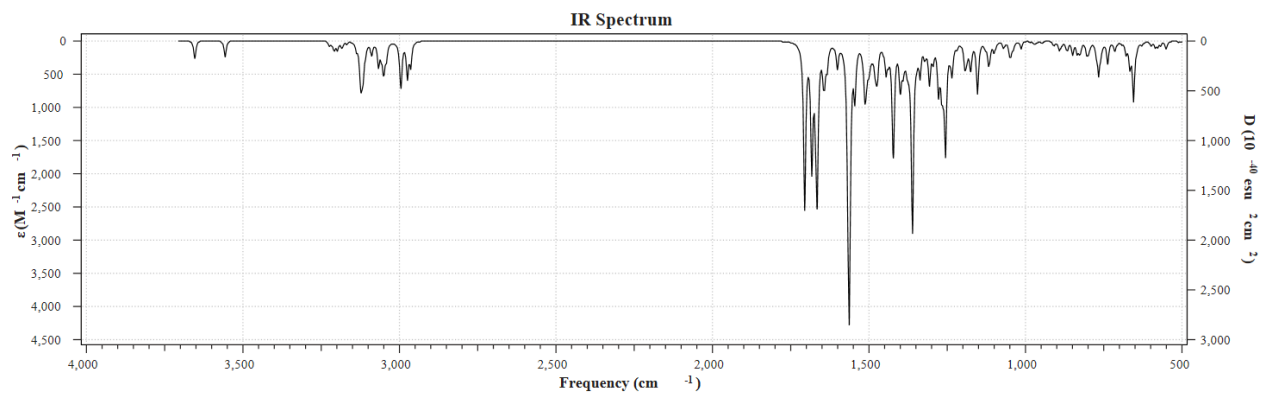

**Figure S28.** Calculated FTIR spectrum of rhodamine dye **C**.

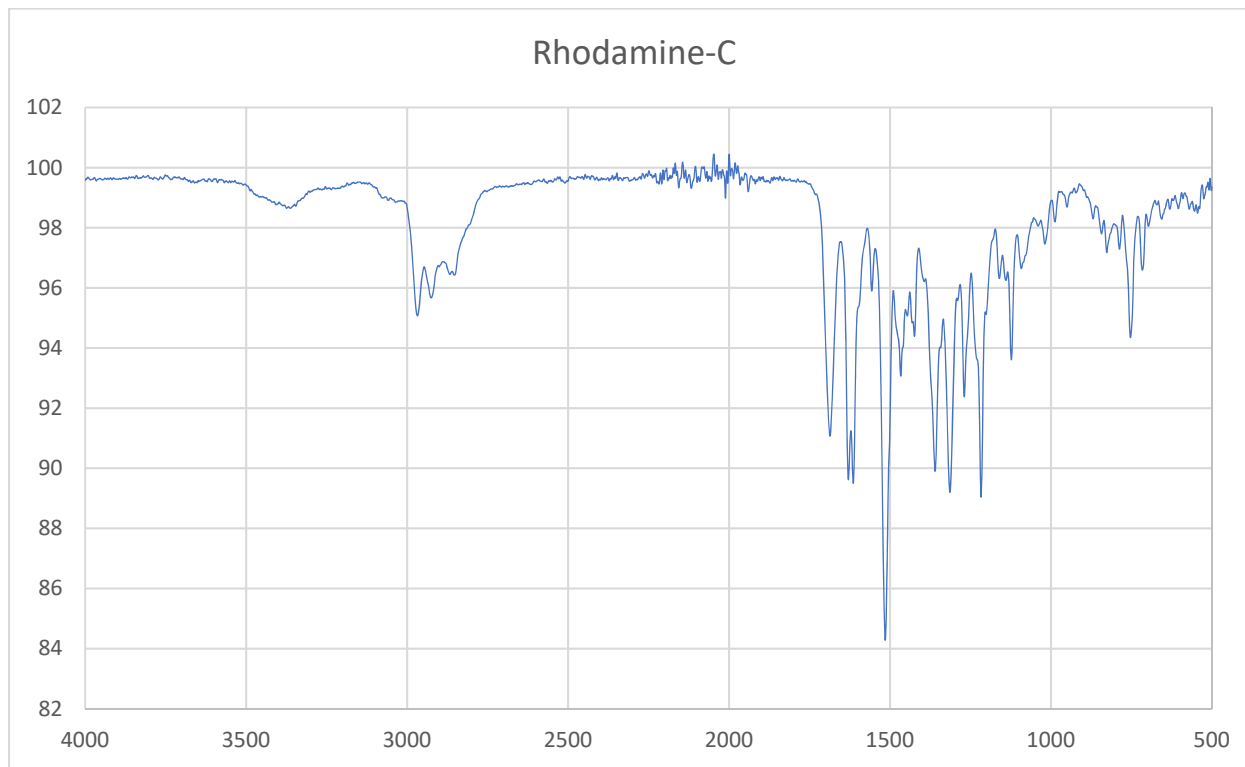

**Figure S29.** The solid state FTIR spectrum of rhodamine dye **C**.

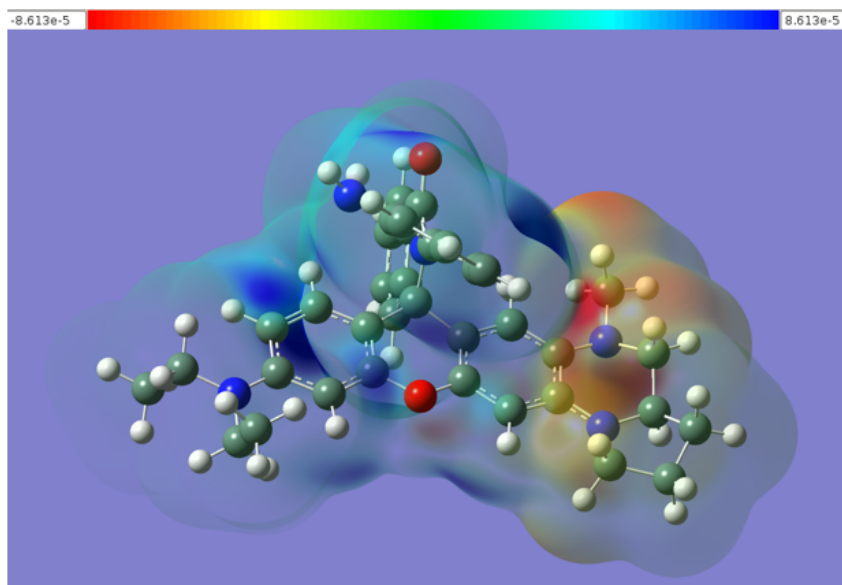

**Figure S30.** Current density difference plot for rhodamine dye **C** obtained by subtracting the SCF (ground state) density from the CI (excited state) density using the Cubegen program in GaussView.

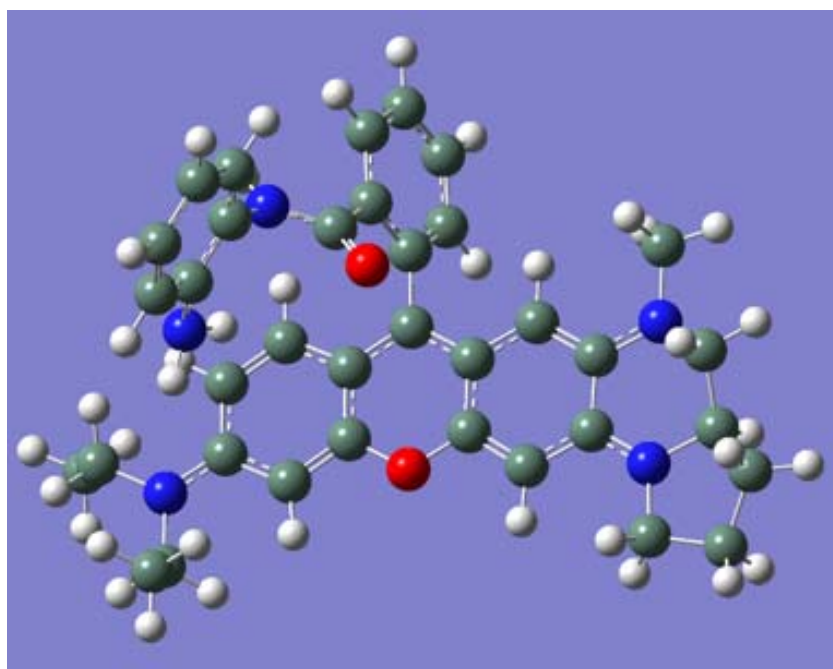

**Figure S31.** Drawing of rhodamine dye **D** with atoms represented as spheres of arbitrary size (H-white, C-grey, N-blue and O-red) using the GaussView<sup>28</sup> program.

**Table S4.** Atomic coordinates for rhodamine dye D.

| Row | Symbol | X        | Y        | Z        |    |   |          |          |          |
|-----|--------|----------|----------|----------|----|---|----------|----------|----------|
|     |        |          |          |          | 41 | C | -6.7879  | 2.785306 | 1.776552 |
| 1   | C      | -3.96667 | 1.075092 | 0.215158 | 42 | H | -6.81071 | 0.832774 | 2.727992 |
| 2   | C      | -2.80188 | 1.853575 | 0.282925 | 43 | H | -8.22643 | 1.119353 | 1.700565 |
| 3   | C      | -1.62549 | 1.376776 | -0.23899 | 44 | N | 4.048404 | 3.138825 | -0.69547 |
| 4   | C      | -1.5401  | 0.097209 | -0.84356 | 45 | H | 4.721331 | 5.057011 | -0.35853 |
| 5   | C      | -2.70804 | -0.70503 | -0.85088 | 46 | H | 2.987108 | 4.893219 | -0.29779 |
| 6   | C      | -3.90706 | -0.25753 | -0.3601  | 47 | H | -5.65153 | -1.00101 | 1.647543 |
| 7   | C      | -0.30448 | -0.32198 | -1.33263 | 48 | H | -6.93618 | -1.29959 | 0.463025 |
| 8   | C      | 0.798757 | 0.544237 | -1.26034 | 49 | H | -6.96638 | 3.288007 | 2.727262 |
| 9   | C      | 0.655869 | 1.793089 | -0.61482 | 50 | H | -7.36913 | 3.303445 | 1.009172 |
| 10  | C      | 1.704132 | 2.662022 | -0.42649 | 51 | H | -0.88428 | -3.44236 | -4.70165 |
| 11  | C      | 2.987545 | 2.33611  | -0.90889 | 52 | H | 0.438634 | -5.1591  | -3.49463 |
| 12  | C      | 3.127737 | 1.113096 | -1.63822 | 53 | H | 1.392036 | -4.64275 | -1.27566 |
| 13  | C      | 2.078392 | 0.257274 | -1.7912  | 54 | H | -4.65976 | 2.786335 | 2.288538 |
| 14  | N      | -5.06594 | -1.00407 | -0.39017 | 55 | H | -5.02541 | 3.638335 | 0.778494 |
| 15  | N      | -5.12934 | 1.530324 | 0.680485 | 56 | C | 5.750968 | 3.195146 | -2.50102 |
| 16  | C      | 3.91896  | 4.409849 | 0.002187 | 57 | H | 6.079662 | 3.226836 | -0.36717 |
| 17  | C      | 4.000209 | 4.256805 | 1.515546 | 58 | H | 5.527152 | 1.684423 | -0.95706 |
| 18  | C      | -6.03392 | -0.71849 | 0.655411 | 59 | H | 5.658031 | 4.278615 | -2.60946 |
| 19  | C      | -6.36477 | 0.752505 | 0.62497  | 60 | H | 5.091586 | 2.724901 | -3.2343  |
| 20  | C      | -7.15594 | 1.301403 | 1.800637 | 61 | H | 6.780696 | 2.917077 | -2.73835 |
| 21  | O      | -0.54326 | 2.177318 | -0.12289 | 62 | H | 4.955    | 3.813941 | 1.80973  |
| 22  | C      | -4.97654 | -2.38278 | -0.81143 | 63 | H | 3.200043 | 3.615265 | 1.891889 |
| 23  | H      | -6.88125 | 0.982072 | -0.31652 | 64 | H | 3.913955 | 5.231993 | 2.000594 |
| 24  | C      | -0.1268  | -1.67075 | -1.90954 | 65 | H | 1.512011 | 3.574462 | 0.120156 |
| 25  | C      | 0.62739  | -2.63739 | -1.23197 | 66 | H | 4.07886  | 0.851936 | -2.08027 |
| 26  | C      | -0.66299 | -1.97031 | -3.15682 | 67 | H | 2.219713 | -0.665   | -2.34307 |
| 27  | C      | 0.829431 | -3.88546 | -1.81202 | 68 | C | 2.996937 | -2.61643 | 1.682186 |
| 28  | C      | -0.45975 | -3.22052 | -3.72849 | 69 | C | 2.927693 | -3.71784 | 2.523688 |
| 29  | H      | -1.23293 | -1.2131  | -3.68468 | 70 | C | 3.462163 | -3.66947 | 3.803119 |
| 30  | C      | 0.284917 | -4.17931 | -3.0558  | 71 | C | 4.064594 | -2.48997 | 4.233825 |
| 31  | C      | 1.129713 | -2.34794 | 0.147618 | 72 | C | 4.138474 | -1.38612 | 3.401216 |
| 32  | O      | 0.404756 | -1.83877 | 0.99249  | 73 | C | 3.608341 | -1.42625 | 2.104517 |
| 33  | N      | 2.42051  | -2.68953 | 0.38187  | 74 | N | 3.736871 | -0.35155 | 1.251708 |
| 34  | C      | 5.400764 | 2.760896 | -1.08488 | 75 | H | 4.613536 | -0.47283 | 3.747205 |
| 35  | H      | -2.62483 | -1.70365 | -1.25587 | 76 | H | 3.40511  | -4.53363 | 4.455258 |
| 36  | H      | -2.81696 | 2.837728 | 0.731649 | 77 | H | 4.483002 | -2.42823 | 5.233615 |
| 37  | H      | -4.55305 | -2.44451 | -1.81565 | 78 | H | 2.438781 | -4.61547 | 2.158196 |
| 38  | H      | -5.97966 | -2.80576 | -0.84244 | 79 | H | 3.845418 | 0.550243 | 1.690932 |
| 39  | H      | -4.35873 | -2.98963 | -0.13445 | 80 | H | 3.106923 | -0.3271  | 0.46332  |
| 40  | C      | -5.30506 | 2.785972 | 1.403323 | 81 | H | 2.969534 | -3.0574  | -0.38197 |

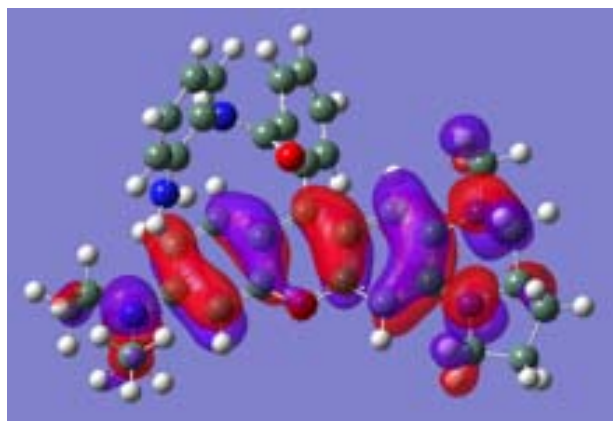

HOMO

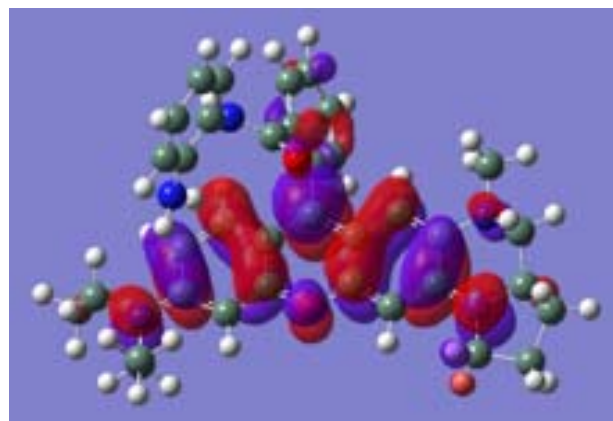

LUMO

**Figure S32.** The HOMO and LUMO for rhodamine dye **D**.

### Rhodamine D UV-Vis Calculated Spectrum

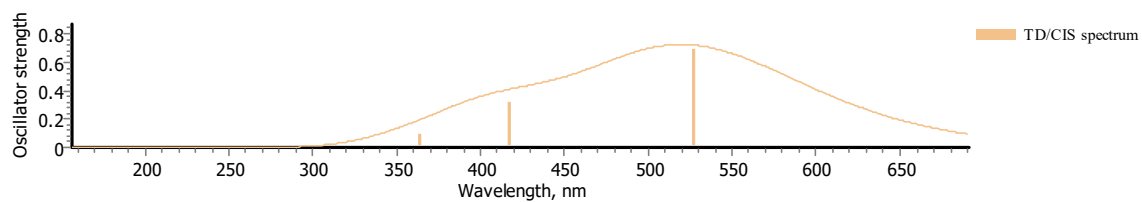

| Energy[nm] | Oscillator Strength |
|------------|---------------------|
| 526.8554   | 0.6902              |
| 454.2569   | 0.0059              |
| 417.6966   | 0.3179              |
| 363.9976   | 0.0905              |
| 351.2518   | 0.0095              |
| 321.0047   | 0.0102              |

**Figure S33.** Calculated UV-Vis spectrum for rhodamine dye **D** and listing of peak positions with oscillator strengths. This represents a HOMO-LUMO transition.

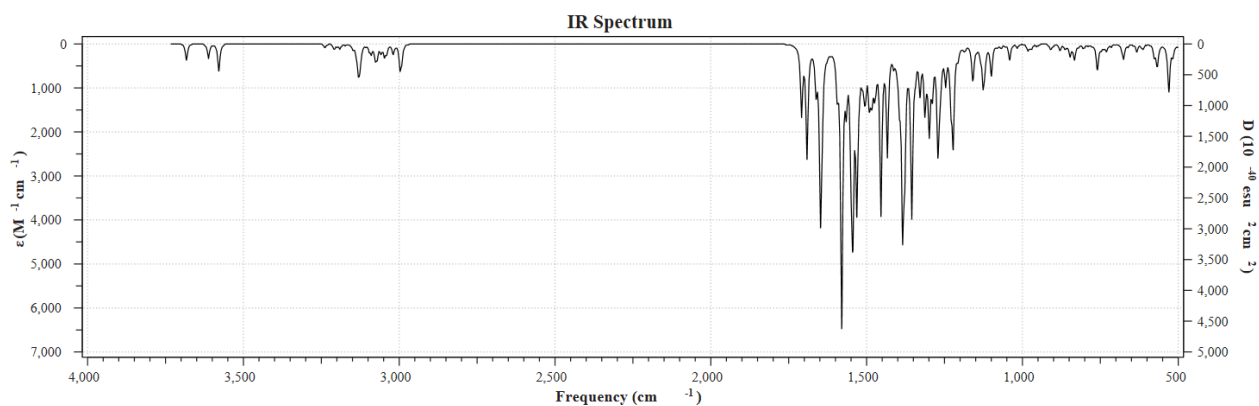

**Figure S34.** Calculated FTIR spectrum of rhodamine dye **D**.

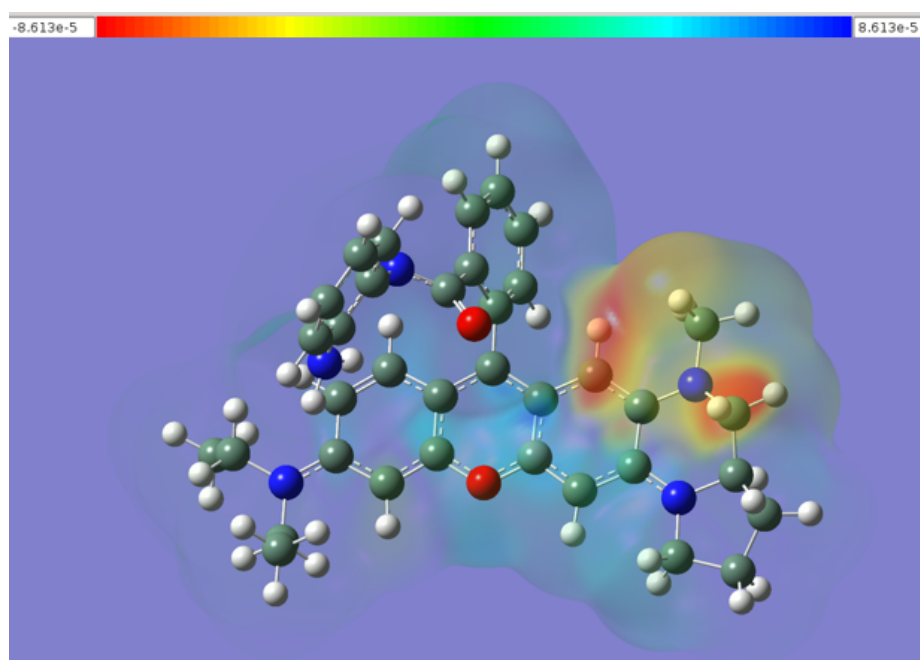

**Figure S35.** Current density difference plot for rhodamine dye **D** obtained by subtracting the SCF (ground state) density from the CI (excited state) density using the Cubegen program in GaussView.

## 8. Cytotoxicity of the rhodamine dyes

We used a standard MTS assay to investigate cytotoxicity of the rhodamine dyes A, B and C. The results show that the dyes have very low cytotoxicity.

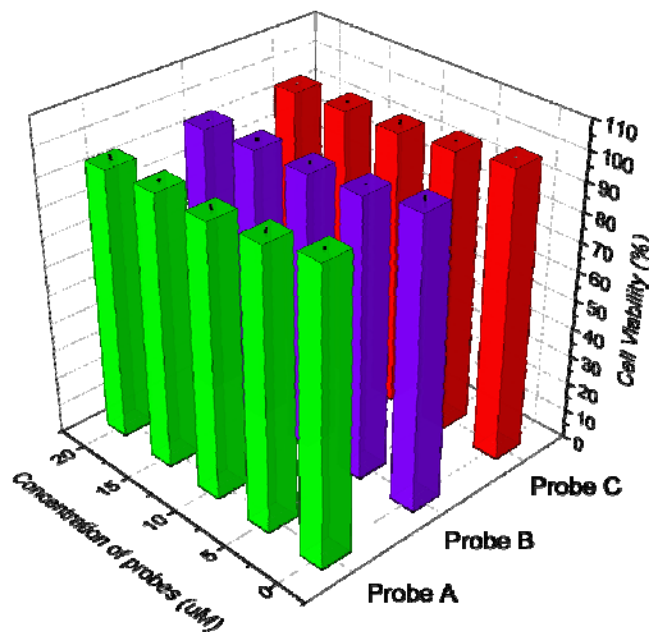

**Figure S36.** Cytotoxicity of rhodamine dyes **A**, **B**, and **C** through standard MTS assay by incubation of HeLa cells with 5, 10, 15, 20  $\mu\text{M}$  of rhodamine dye **A**, **B**, or **C** for 48 hours, respectively. The cell viability is directly related to the absorbance at 490 nm.

## 9. Cell culture and fluorescent imaging

**Cell Culture and Cytotoxicity Assay.** MCF7 cells and HeLa cells were purchased at ATCC (Manassas, VA) and were cultured in RPMI 1640 medium (Gibco) and modified Eagle's medium (DMEM, Gibco) in the presence of 10 % fetal bovine serum (FBS, fisher Scientific) under 5 %  $\text{CO}_2$  at the temperature, respectively. Standard MTS assay was employed to test the cytotoxicity of rhodamine dyes **A**, **B** and **C** against HeLa cell line. After the cells were further seeded into in a 96-well plate (about  $7 \times 10^3$  cells per well), and were further incubated for 24 hours. The HeLa cells were put in the fresh culture

medium containing probes **A**, **B**, or **C** with concentration from 0, 5, 10, 15 to 20  $\mu\text{M}$ , and further incubated for 48 h at 37 °C in 5%  $\text{CO}_2$  humidified atmosphere, followed by further incubating the cells in a fresh culture medium (80  $\mu\text{L}$ ) containing 20  $\mu\text{L}$  CellTiter 96<sup>®</sup> Aqueous for another 2 h. Untreated cells were used as controls. The cell viability was determined by making the comparison of the 490 nm absorption between the control cells in the absence of the probe with that of the cells treated with the probe.

**Rhodamine dye C applications in cellular imaging.** HeLa cells were seeded into 35 mm x 12 mm glass-bottom culture dishes and incubated for 24 h. When freshly prepared FBS-free medium containing rhodamine dye **C** with concentrations ranging from 1, 5, 10, to 15  $\mu\text{M}$  was used to replace the cell culture medium, the cells were further incubated for 30 min under 5%  $\text{CO}_2$  humidified atmosphere. Hoechst and LysoSensor green were added to the solution as the final concentration of 1  $\mu\text{g}/\text{mL}$  and 1  $\mu\text{M}$  to incubate another 30 min, respectively. The cells were rinsed with PBS buffer twice again before imaging. To adjust intracellular pH values, the cells were washed with PBS buffer twice before they were treated with 5  $\mu\text{g}/\text{mL}$  nigericin in citric buffers with different pH values from 3.0, 3.5, 4.0, 4.5, 5.0, 5.5, 6.0, 6.5, 7.0, 7.5 to equilibrate the intracellular and extracellular pH for 30 min. The cells were incubated with rhodamine dye **C** for 30 min before they were rinsed with PBS buffer twice again for imaging. For the experiment for monitoring lysosomal pH changes, HeLa cells were cultured in medium in the absence and in the presence of 10 mM  $\text{NH}_4\text{Cl}$ , 100  $\mu\text{M}$  NEM (*N*-ethylmaleimide), and 100  $\mu\text{M}$   $\text{H}_2\text{O}_2$  before incubating with rhodamine dye **C** for another 30 min. For an experiment under drug stimulation, HeLa cells were cultured in medium in the presence of different concentrations of chloroquine from 50  $\mu\text{M}$ , 100  $\mu\text{M}$  to 200  $\mu\text{M}$  for 30 min followed by incubation with rhodamine dye **C** with another 30 min. Confocal fluorescence microscope (Olympus IX 81) was employed to collect cellular fluorescence images from 425 to 475 nm for blue fluorescence of Hoechst under excitation at 405 nm, from 525 to 575 nm for green fluorescence of LysoSensor green under excitation at 488 nm, and from 650 to 700 nm for red fluorescence of rhodamine dye **C** under the excitation at 559 nm.

LysoSensor green was used to determine whether rhodamine dye **C** was located in lysosomes in live cells (Figure S37). Confocal microscopic co-localization analysis of rhodamine dye **C** and lysotracker green gave the Pearson's coefficient value of 0.89 or higher, indicating that rhodamine dye **C** accumulates and becomes activated to engender fluorescence in lysosomes in live cells (Figure S37).

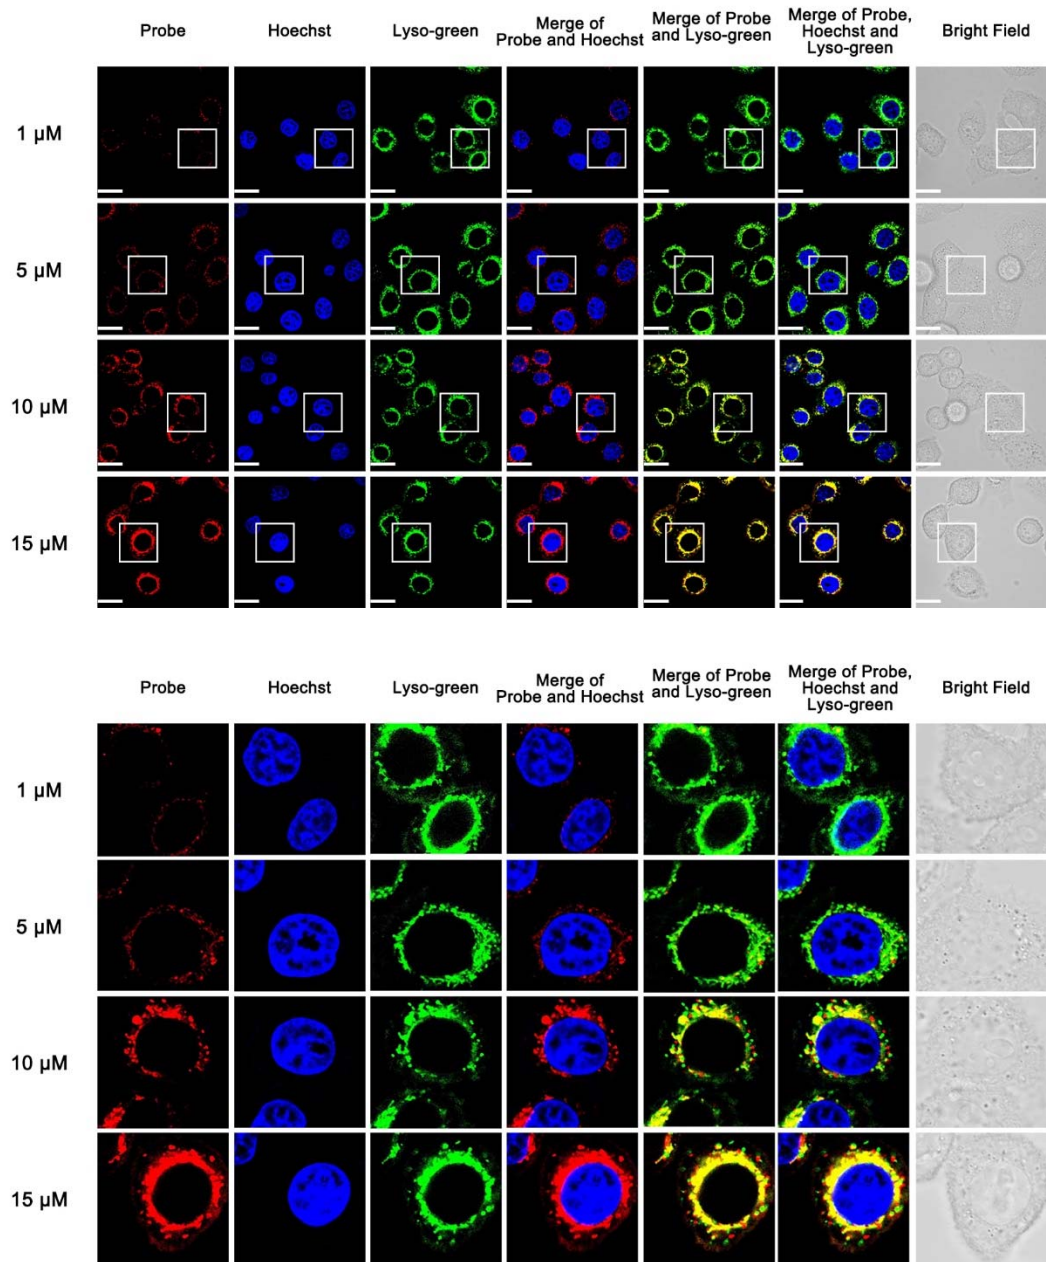

**Figure S37.** Enlarged acidity-activated turn-on cellular fluorescence images of rhodamine dye **C** in lysosomes in HeLa cells. HeLa cells were cultured in media containing 1  $\mu\text{g/ml}$  Hoechst stain, 1  $\mu\text{M}$  Lyso-sensor green and rhodamine dye **C** with different concentrations. The images were obtained by confocal fluorescence microscopy with a scale bar of 20  $\mu\text{m}$ .



The filter sets used to image rhodamine dye **C**, Hoechst and Lyso-green were excitation 559 nm and emission 675/50 nm, excitation 405 nm and emission 450/50 nm and excitation 488 nm and emission 550/50 nm, respectively.

We also investigated whether rhodamine dye **C** could be used to detect intracellular pH changes in MCF7 human breast cells. The imaging results convincingly demonstrate that rhodamine dye **C** sensitively responds to intracellular pH changes in MCF7 cells as pH decreases from 7.5 to 4.0 cause cellular fluorescence increases.

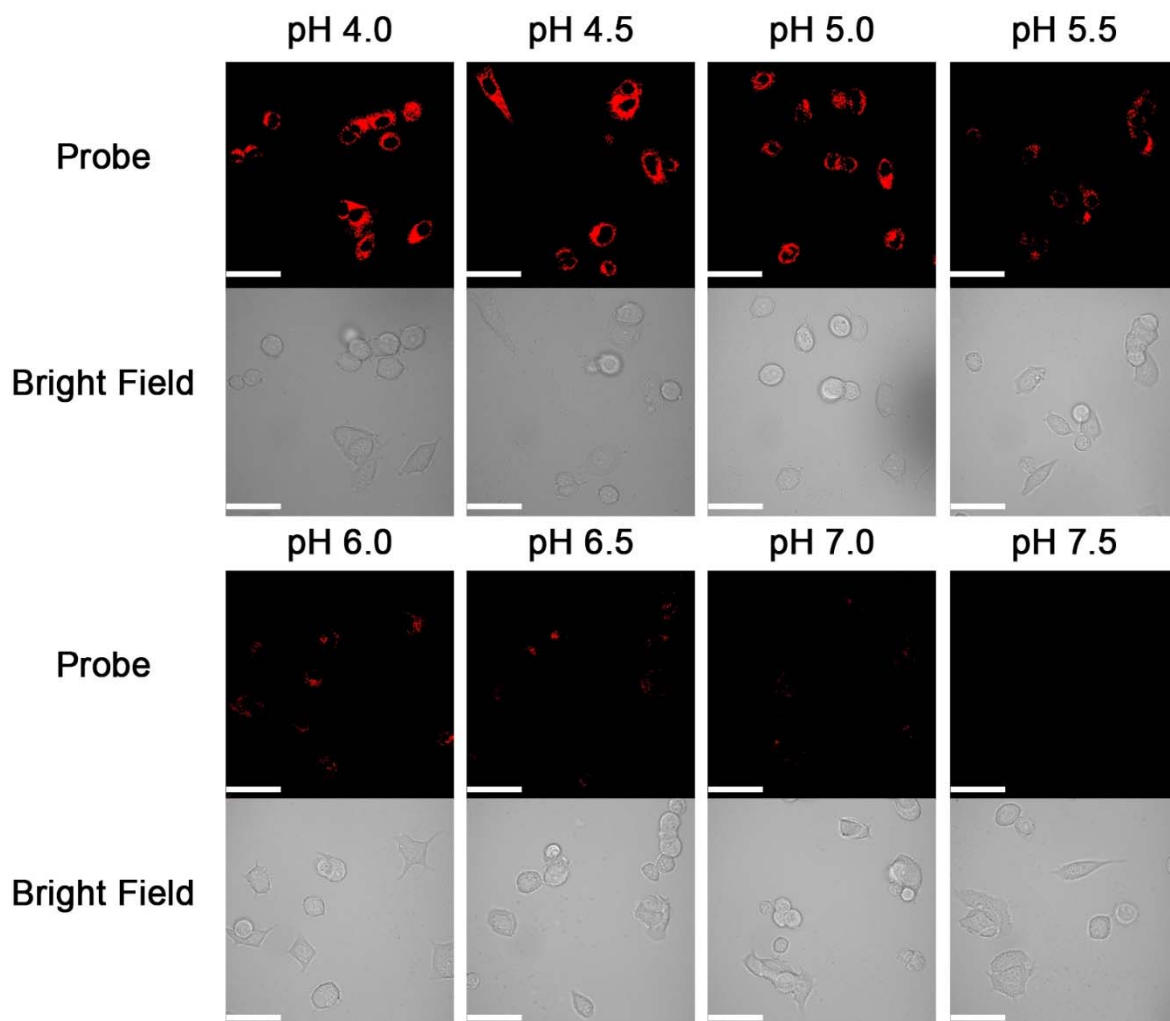

**Figure 38.** Cellular fluorescence images of 10  $\mu\text{M}$  rhodamine dye **C** inside MCF7 cells with different intracellular pH values, which was adjusted by using 5  $\mu\text{g}/\text{mL}$   $\text{H}^+/\text{K}^+$  ionophore nigericin to equilibrate the intracellular and extracellular pH in media with different pH values. Confocal fluorescence microscopy was employed to collect the images with a scale bar of 50  $\mu\text{m}$ . The filter sets used to image rhodamine dye **C** was excitation 559 nm and emission 675/50 nm.

## 10. References

1. T. Jokic, S. M. Borisov, R. Saf, D. A. Nielsen, M. Kuhl and I. Klimant, *Anal. Chem.*, 2012, **84**, 6723-6730.
2. Y. H. Li, Y. J. Wang, S. Yang, Y. R. Zhao, L. Yuan, J. Zheng and R. H. Yang, *Anal. Chem.*, 2015, **87**, 2495-2503.
3. D. D. He, W. Liu, R. Sun, C. Fan, Y. J. Xu and J. F. Ge, *Anal. Chem.*, 2015, **87**, 1499-1502.
4. G. L. Niu, P. P. Zhang, W. M. Liu, M. Q. Wang, H. Y. Zhang, J. S. Wu, L. P. Zhang and P. F. Wang, *Anal. Chem.*, 2017, **89**, 1922-1929.
5. L. Fan, Y. J. Fu, Q. L. Liu, D. T. Lu, C. Dong and S. M. Shuang, *Chem. Commun.*, 2012, **48**, 11202-11204.
6. X. D. Liu, Y. Xu, R. Sun, Y. J. Xu, J. M. Lu and J. F. Ge, *Analyst*, 2013, **138**, 6542-6550.
7. P. Li, H. B. Xiao, Y. F. Cheng, W. Zhang, F. Huang, W. Zhang, H. Wang and B. Tang, *Chem. Commun.*, 2014, **50**, 7184-7187.
8. Q. Q. Wan, S. M. Chen, W. Shi, L. H. Li and H. M. Ma, *Angew. Chem. Int. Ed.*, 2014, **53**, 10916-10920.
9. S. Takahashi, Y. Kagami, K. Hanaoka, T. Terai, T. Komatsu, T. Ueno, M. Uchiyama, I. Koyama-Honda, N. Mizushima, T. Taguchi, H. Arai, T. Nagano and Y. Urano, *J. Am. Chem. Soc.*, 2018, **140**, 5925-5933.
10. T. Myochin, K. Kiyose, K. Hanaoka, H. Kojima, T. Terai and T. Nagano, *J. Am. Chem. Soc.*, 2011, **133**, 3401-3409.
11. J. Y. Zhang, Z. N. Liu, P. Lian, J. Qian, X. W. Li, L. Wang, W. Fu, L. Chen, X. B. Wei and C. Li, *Chem. Sci.*, 2016, **7**, 5995-6005.
12. S. L. Shen, X. F. Zhang, Y. Q. Ge, Y. Zhu, X. Q. Lang and X. Q. Cao, *Sens. Actuator B-Chem.*, 2018, **256**, 261-267.
13. M. X. Fang, S. Xia, J. H. Bi, T. P. Wigstrom, L. Valenzano, J. B. Wang, W. Mazzi, M. Tanasova, F. T. Luo and H. Y. Liu, *Chem. Commun.*, 2018, **54**, 1133-1136.
14. X. F. Zhang, C. Wang, Z. Han and Y. Xiao, *Acs Appl. Mater. Interfaces*, 2014, **6**, 21669-21676.
15. J. B. Wang, S. Xia, J. H. Bi, M. X. Fang, W. F. Mazzi, Y. B. Zhang, N. Conner, F. T. Luo, H. P. Lu and H. Y. Liu, *Bioconjug. Chem.*, 2018, **29**, 1406-1418.
16. S. W. Zhang, T. H. Chen, H. M. Lee, J. H. Bi, A. Ghosh, M. X. Fang, Z. C. Qian, F. Xie, J. Ainsley, C. Christov, F. T. Luo, F. Zhao and H. Y. Liu, *ACS Sens.*, 2017, **2**, 924-931.
17. J. T. Zhang, M. Yang, W. F. Mazzi, K. Adhikari, M. X. Fang, F. Xie, L. Valenzano, A. Tiwari, F. T. Luo and H. Y. Liu, *ACS Sens.*, 2016, **1**, 158-165.
18. J. T. Zhang, M. Yang, C. Li, N. Dorh, F. Xie, F. T. Luo, A. Tiwari and H. Y. Liu, *J. Mater. Chem. B*, 2015, **3**, 2173-2184.
19. S. Xia, J. B. Wang, J. H. Bi, X. Wang, M. X. Fang, T. Phillips, A. May, N. Conner, M. Tanasova, F. T. Luo and H. Y. Liu, *Sens. Actuator B-Chem.*, 2018, **265**, 699-708.
20. W. Chen, S. Xu, J. J. Day, D. Wang and M. Xian, *Angew. Chem.*, 2017, **129**, 16838-16842.
21. S. Kamino, M. Murakami, M. Tanioka, Y. Shirasaki, K. Watanabe, J. Horigome, Y. Ooyama and S. Enomoto, *Organic Letters*, 2014, **16**, 258-261.
22. Y.-J. Gong, X.-B. Zhang, G.-J. Mao, L. Su, H.-M. Meng, W. Tan, S. Feng and G. Zhang, *Chemical Science*, 2016, **7**, 2275-2285.
23. Y. Yuan, S. Xu, X. Cheng, X. Cai and B. Liu, *Angew. Chem. Int. Ed. Engl.*, 2016, **55**, 6457-6461.
24. L. Yuan, W. Lin, Y. Yang and H. Chen, *J. Am. Chem. Soc.*, 2012, **134**, 1200-1211.
25. E. Cielen, A. Tahri, K. Ver Heyen, G. J. Hoornaert, F. C. De Schryver and N. Boens, *Journal of the Chemical Society, Perkin Transactions 2*, 1998, DOI: 10.1039/A802183J, 1573-1580.
26. S. Melchor and J. A. Dobado, *J. Chem. Inf. Comput. Sci.*, 2004, **44**, 1639-1646.

27. M. D. Hanwell, D. E. Curtis, D. C. Lonie, T. Vandermeersch, E. Zurek and G. R. Hutchison, *Journal of Cheminformatics*, 2012, **4**, 17.
28. GaussView, V. 6, R. Dennington, T. A. Keith and J. M. Millam, Semichem Inc. Shawnee Mission, KS, 2016.
29. A. Austin, G. A. Petersson, M. J. Frisch, F. J. Dobek, G. Scalmani and K. Throssell, *Journal of Chemical Theory and Computation*, 2012, **8**, 4989-5007.
30. K. Raghavachari and G. W. Trucks, *J. Chem. Phys.*, 1989, **91**, 1062-1065.
31. A. J. H. Wachters, *J. Chem. Phys.*, 1970, **52**, 1033-1036.
32. P. J. Hay, *J. Chem. Phys.*, 1977, **66**, 4377-4384.
33. Gaussian 16 Revision A.03, M. J. Frisch, G. W. Trucks, H. B. Schlegel, G. E. Scuseria, M. A. Robb, J. R. Cheeseman, G. Scalmani, V. Barone, G. A. Petersson, H. Nakatsuji, X. Li, M. Caricato, A. V. Marenich, J. Bloino, B. G. Janesko, R. Gomperts, B. Mennucci, H. P. Hratchian, J. V. Ortiz, A. F. Izmaylov, J. L. Sonnenberg, Williams, F. Ding, F. Lipparini, F. Egidi, J. Goings, B. Peng, A. Petrone, T. Henderson, D. Ranasinghe, V. G. Zakrzewski, J. Gao, N. Rega, G. Zheng, W. Liang, M. Hada, M. Ehara, K. Toyota, R. Fukuda, J. Hasegawa, M. Ishida, T. Nakajima, Y. Honda, O. Kitao, H. Nakai, T. Vreven, K. Throssell, J. A. Montgomery Jr., J. E. Peralta, F. Ogliaro, M. J. Bearpark, J. J. Heyd, E. N. Brothers, K. N. Kudin, V. N. Staroverov, T. A. Keith, R. Kobayashi, J. Normand, K. Raghavachari, A. P. Rendell, J. C. Burant, S. S. Iyengar, J. Tomasi, M. Cossi, J. M. Millam, M. Klene, C. Adamo, R. Cammi, J. W. Ochterski, R. L. Martin, K. Morokuma, O. Farkas, J. B. Foresman and D. J. Fox, *Journal*, 2016.
34. M. E. Casida, C. Jamorski, K. C. Casida and D. R. Salahub, *J. Chem. Phys.*, 1998, **108**, 4439-4449.
35. E. Cancès, B. Mennucci and J. Tomasi, *J. Chem. Phys.*, 1997, **107**, 3032-3041.
36. L. Skripnikov, *Chemissian*, 2005-2017, [www.chemissian.com](http://www.chemissian.com).
